# Supplementary material for: γ-Valerolactone-introduced controlled-isomerization of glucose for lactic acid production over an Sn-Beta catalyst
Source: Royal Society of Chemistry journal article supplement (doi:10.1039/d1gc00378j), 2021-01-01
Supplement: d1gc00378j1.pdf [file d1gc00378j1.pdf]

## Supplementary Information

### **$\gamma$ -Valerolactone-Introduced Controlled-Isomerization of Glucose for Lactic Acid Production over Sn-Beta Catalyst**

Xinpeng Zhao,<sup>‡a,b</sup> Zhimin Zhou,<sup>‡a,b</sup> Hu Luo,<sup>a</sup> Yanfei Zhang,<sup>a,b</sup> Wang Liu,<sup>a,b</sup> Gai Miao,<sup>a</sup> Lijun Zhu,<sup>a,b</sup> Lingzhao Kong,<sup>\*a,b</sup> Shenggang Li<sup>\*a,b,c</sup> and Yuhan Sun<sup>\*a,b,c</sup>

a. CAS Key Laboratory of Low-Carbon Conversion Science and Engineering, Shanghai Advanced Research Institute, Chinese Academy of Sciences, Shanghai 201210 (P.R. China). E-mail: konglz@sari.ac.cn, lisq@sari.ac.cn, sunyh@sari.ac.cn

b. University of Chinese Academy of Sciences, Beijing 100049 (P.R. China)

c. School of Physical Science and Technology, ShanghaiTech University, Shanghai 201203 (P.R. China) .

‡. These two authors contribute equally.

## 1. Experimental and Computational Methods

### 1.1 Catalyst synthesis and characterization

All chemicals were purchased from the major commercial suppliers: the zeolite beta with  $\text{SiO}_2/\text{Al}_2\text{O}_3=25$  was purchased from Nankai University Catalyst Co., Ltd, tin (IV) chloride pentahydrate ( $\text{SnCl}_4 \cdot 5\text{H}_2\text{O}$ , Macklin, AR),  $\text{HNO}_3$  (65.0 wt % in water, Macklin), L-Lactic acid (1.0 mol/L standard solution, Merck, HPLC), fructose (AR, 99.0 %), glucose (AR, 99.0 %),  $\gamma$ -valerolactone (GVL, Macklin, 98 %) and other reagents were from Sinopharm Chemical Reagent Co, Ltd (Shanghai, China).

For the Synthesis of deAl-Beta catalyst, commercial Beta zeolite with a  $\text{SiO}_2/\text{Al}_2\text{O}_3=25$  was calcinated at 550 °C for 6 h before usage to remove the template and adsorbed impurities. deAl-Beta, short for dealuminated Beta zeolite, was prepared by stirring commercial Beta in a 13.0 mol/L aqueous nitric acid solution at 100 °C for 20 h. Afterwards the powder was washed with water until the PH was neutral and dried at 100 °C.

For the Synthesis of Sn-Beta catalyst, deAl-Beta was pretreated at 373 K overnight to remove physisorbed water. Afterward, 3.0 g of the solid powder was finely ground with appropriate amount of  $\text{SnCl}_4 \cdot 5\text{H}_2\text{O}$  in the mortar for 1 h. After this, the solids were calcined under air (550 °C, 5 °C  $\text{min}^{-1}$ , 6 h). The synthesized catalysts were denoted as x wt% Sn-Beta, where x denotes the content of Sn in catalyst added theoretically.<sup>1</sup>

The phase composition of the samples was determined by X-ray powder diffraction (XRD) by a Rigaku Ultima IV X-ray diffractometer (40 kV, 40 mA) using the CuK $\alpha$  radiation in the 2 Theta range from 5° to 70° at a scanning rate of 4°/min. The morphological information was examined by the scanning electron microscopy (SEM) using SUPRRATM 55 with a 2.0 kV accelerating voltage. UV-vis diffuse reflectance spectra were recorded on a Shimadzu UV-2700 spectrophotometer in the range of 200-800 nm, with  $\text{BaSO}_4$  as the reference.  $\text{N}_2$ -adsorption and desorption were carried out with a Micromeritics ASAP 2020 equipment to determine the specific surface area, micropore area and pore size distribution of the samples. The sample to be tested was first degassed at 300 °C for 10 h, and then tested with  $\text{N}_2$  as the medium at -196 °C. The concentration of Sn and Al was measured by the inductively coupled plasma-atomic emission spectrometry (ICP-AES) on Perkin Elmer Optima 3000. Raman spectra of dehydrated samples were recorded on a high-resolution, dispersive Raman spectrometer system (Horiba-JobinYvon LabRam-IR) with the He-Cd laser with a 325-nm line as the excitation source. FT-IR spectra of

pyridine adsorption were performed with a spectral resolution of  $4\text{ cm}^{-1}$  on a Nicolet Nexus 670 FT-IR spectrometer. In a home-made vacuum infrared cell with  $\text{CaF}_2$  windows, a self-supporting wafer of the sample (about 10 mg) was initially dried under vacuum at  $350\text{ }^\circ\text{C}$  for 1 h, then cooled down to  $50\text{ }^\circ\text{C}$  and saturated with about 25 mbar of pyridine vapor at  $50\text{ }^\circ\text{C}$  for 10 min and then evacuated again for 30 min to fully remove the physisorbed pyridine. Finally, the evacuated sample containing chemisorbed pyridine was heated to 100, 200 and  $350\text{ }^\circ\text{C}$  for 30 min, with a heating rate of  $10\text{ }^\circ\text{C}/\text{min}$ , and the IR spectra were recorded in situ at these temperatures. The amounts of acid sites were determined from the integral intensity of characteristic bands ( $1450\text{ cm}^{-1}$  for Lewis acid sites, and  $1540\text{ cm}^{-1}$  for Brønsted acid sites) using the molar extinction coefficients of Emeis. X-ray photoelectron spectrometry (XPS) was used to probe the Sn state on a K-Alpha spectrometer (Thermo Fisher Scientific). The Thermogravimetric analysis (TGA) was performed under He or air flow on a Netzsch STA449F5 instrument. For the experiment, 10 mg of samples was placed in the crucible and heated from  $40\text{ }^\circ\text{C}$  to  $900\text{ }^\circ\text{C}$  under He to inspect the weight loss of the samples. For the synthesized of Sn-Beta catalyst pre-adsorbed with 16.6 wt% GVL, 0.2g GVL was added to 1g catalyst and 1ml ethanol was added for the dispersion of GVL, then the catalyst was dried at  $100^\circ\text{C}$ , 5h to evacuate ethanol.

## 1.2 Catalytic evaluation and product analysis

The catalytic conversion of stock (glucose, fructose and 1,3-dihydroxyacetone) was carried out in a stainless steel autoclave (Parr, 30 ml) with an initial He pressure of 4 MPa at  $200\text{ }^\circ\text{C}$  for 30 min, and 30 min was needed to warm up from room temperature to  $200\text{ }^\circ\text{C}$ . Generally, a mixture of reactant, the solid acid catalyst, and  $\gamma$ -valerolactone/water mixture were loaded into the sealed autoclave with a stirring speed of 530 rpm. After the reaction, the autoclave was cooled with ice bath and the liquid solution was separated from the solid mixture by centrifugation. The collected liquid solution was filtered through  $0.45\text{ }\mu\text{m}$  pore-size filters prior to analysis. The separated solid catalyst was washed with water and ethanol mixture for six times and dried at  $100\text{ }^\circ\text{C}$  overnight for the recycle of catalyst. Glucose isomerization reaction was conducted at  $100\text{ }^\circ\text{C}$  to avoid further subsequent reactions, and other reaction conditions were same with those of batch lactic acid synthesis reactions.

The liquid products were quantified by HPLC (Shimadzu LC-20AD, Aminex HPX-87H ion exclusion column:  $300\text{ mm} \times 7.8\text{ mm}$ , column temperature:  $50\text{ }^\circ\text{C}$ , mobile phase:  $0.005\text{ M}$  aqueous  $\text{H}_2\text{SO}_4$  with a flow rate of  $0.65\text{ mL}/\text{min}$ ) with a differential refraction detector (RID-10A) for LA and UV detector at  $284\text{ nm}$  for 5-HMF and MF. The conversion of glucose was calculated based on the HPLC data using the equation:

$$\text{Conversion} = (\text{moles of glucose} - \text{moles of glucose in the resultant liquid determined by HPLC}) \div (\text{moles of in glucose}) \times 100\%.$$

The yields of LA, 5-HMF and MF were calculated based on carbon via the equations:

$$\text{Yield} = (\text{moles of carbon in the products determined by HPLC}) \div (\text{moles of carbon in glucose}) \times 100\%.$$

### 1.3 Computational methods

The Vienna Ab initio Simulation Package (VASP) was used to perform all the DFT calculations with the projector augmented wave (PAW) potentials and the Perdew–Burke–Ernzerhof (PBE) exchange–correlation functional.<sup>2–5</sup> Van der Waals interactions were accounted for by the Grimme’s DFT-D3 method.<sup>6</sup> An energy cut-off of 400 eV and the Gaussian smearing width of 0.05 eV were employed. The electronic energy of the supercell was converged to  $10^{-6}$  eV, and the force on all the unconstrained atoms were converged to  $0.01 \text{ eV } \text{Å}^{-1}$ . Brillouin zone sampling was restricted to the  $\Gamma$  point. The periodic model of Sn-Beta polymorph zeolite was used in this study.<sup>7</sup> A complete zeolite Beta unit cell containing an open lattice Sn site (Figure S11) is generated by replacing a Si atom by a Sn atom at the T9 site of Beta.

## 2. Additional table and figures

**Table S1 Physicochemical properties of the synthesized materials**

| Samples          | Sn content mg/g <sup>a</sup> | S <sub>BET</sub> (m <sup>2</sup> g <sup>-1</sup> ) <sup>1</sup> | Micropore area (m <sup>2</sup> g <sup>-1</sup> ) | Micropore volume (mL g <sup>-1</sup> ) | Brønsted site density(mmol g <sup>-1</sup> ) | Lewis site density(mmol g <sup>-1</sup> ) <sup>b</sup> |
|------------------|------------------------------|-----------------------------------------------------------------|--------------------------------------------------|----------------------------------------|----------------------------------------------|--------------------------------------------------------|
| Al-Beta          | -                            | 592.5                                                           | 454.1                                            | 0.181                                  | 0.155                                        | 0.072                                                  |
| deAl-beta        | -                            | 580.9                                                           | 444.5                                            | 0.177                                  | 0.018                                        | 0.017                                                  |
| 0.5 wt% Sn-beta  | 5.72                         | 576.4                                                           | 420.4                                            | 0.168                                  | 0.017                                        | 0.036                                                  |
| 0.75 wt% Sn-beta | 7.60                         | 574.6                                                           | 419.3                                            | 0.167                                  | 0.025                                        | 0.072                                                  |
| 1.5 wt%          | 15.92                        | 554.9                                                           | 401.7                                            | 0.161                                  | 0.023                                        | 0.131                                                  |

|         |       |       |       |       |       |       |
|---------|-------|-------|-------|-------|-------|-------|
| Sn-beta |       |       |       |       |       |       |
| 3.0 wt% | 31.91 | 535.7 | 393.3 | 0.157 | 0.021 | 0.131 |
| Sn-beta |       |       |       |       |       |       |
| 5.0 wt% | 47.74 | 525.0 | 390.2 | 0.156 | 0.029 | 0.136 |
| Sn-beta |       |       |       |       |       |       |

a. Measured by ICP ; b. Acids calculated from peak areas of FT-IR spectra obtained by pyridine desorption 350 °C.

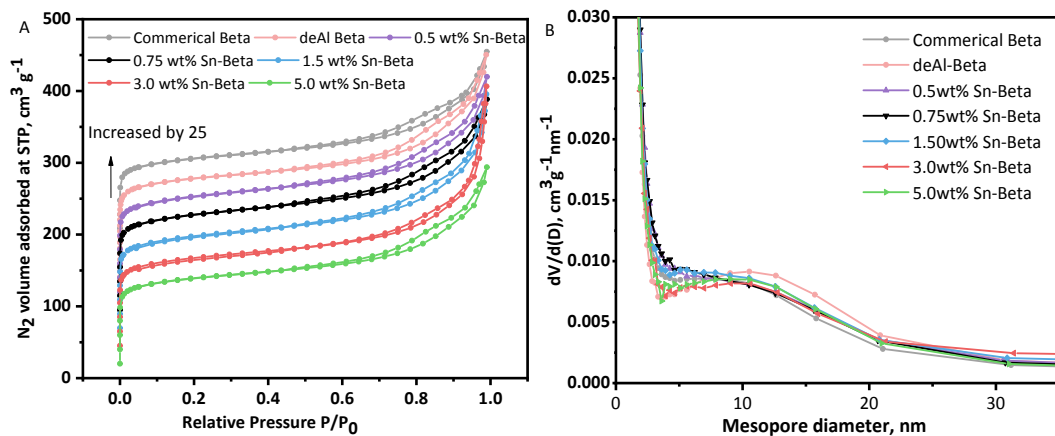

Figure S1. (a) N<sub>2</sub> adsorption-desorption isotherms and (b) the corresponding mesopore size distributions of the samples

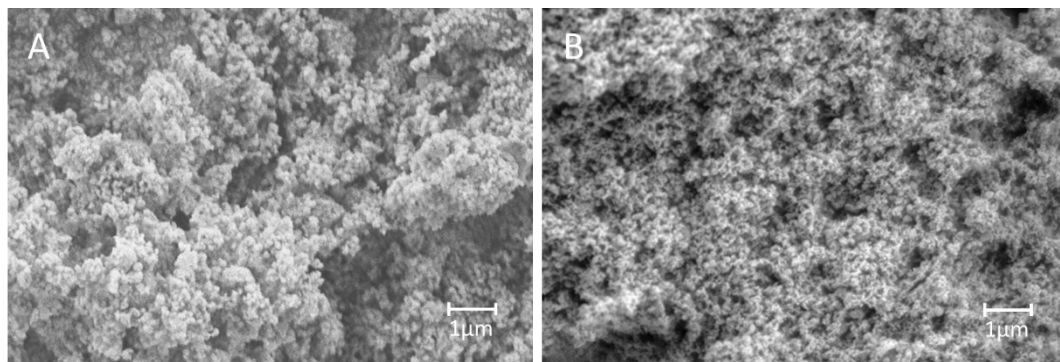

**Figure S2. Typical SEM micrograph of (a) commercial Beta; (b) 0.75 wt% Sn-Beta**

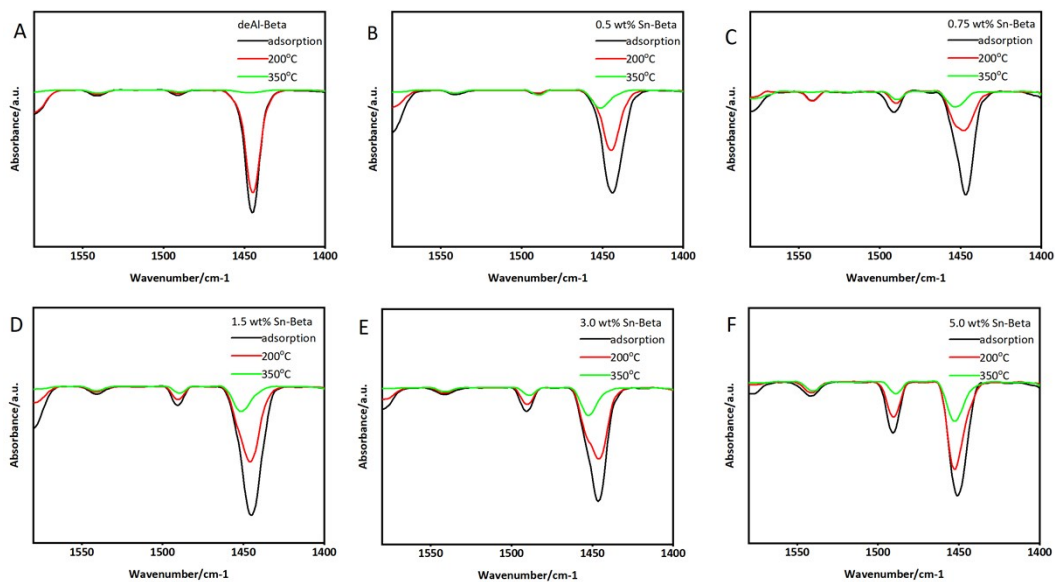

**Figure S3. Py-IR of (a) deAl-Beta; (b) 0.5 wt% Sn-Beta; (c) 0.75 wt% Sn-Beta; (d) 1.5 wt% Sn-Beta; (e) 3.0 wt% Sn-Beta; (f) 5.0 wt% Sn-Beta**

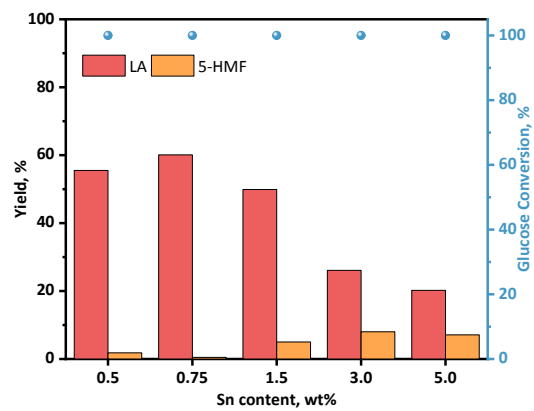

**Figure S4. Product distributions from glucose with different Sn-Beta catalysts**

Reaction conditions: 0.5 h, 50.0 mg glucose, 10.0 mL water, 4 MPa N<sub>2</sub>, m(glucose):m(Sn)=50:1, 200 °C, 530 rpm.



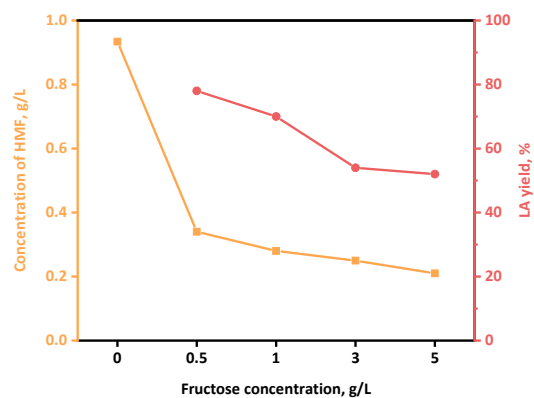

**Figure S5. HMF stability and LA yield at 1g/L HMF and different fructose concentration.**

Reaction conditions: 0.5 h, 10.0 mg HMF; 0, 5.0, 10.0, 30.0, and 50.0 mg fructose was added for different fructose concentration, 10.0 mL water, 4 MPa N<sub>2</sub>, 200 °C, 100.0 mg 0.75 wt% Sn-Beta catalyst, 530 rpm.

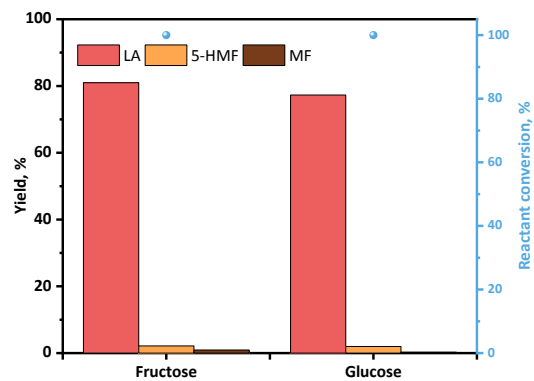

**Figure S6. Lactic acid synthesized with fructose or glucose concentration of 1.0 g/L**

Reaction conditions: 0.5 h, 10.0mg fructose or glucose, 10.0 mL water, 4 MPa N<sub>2</sub>, 200 °C, 100.0 mg 0.75 wt% Sn-Beta catalyst, 530 rpm.

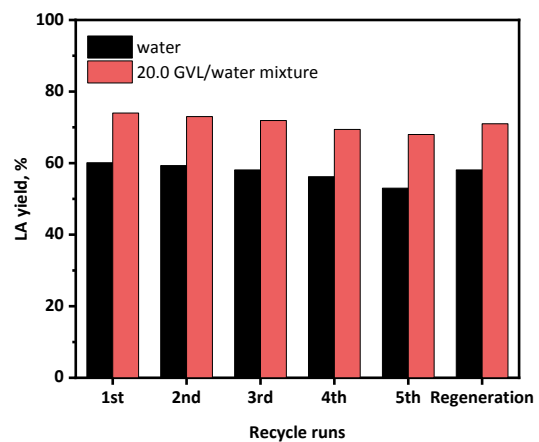

**Figure S7. Catalytic recycling results for Sn-Beta catalyst in water and 20.0 wt% GVL/water.**

Reaction conditions: 0.5 h, 50.0 mg glucose, 10.0 mL water, 4 MPa N<sub>2</sub>, 200 °C, 100.0 mg 0.75 wt% Sn-Beta catalyst, 530 rpm.

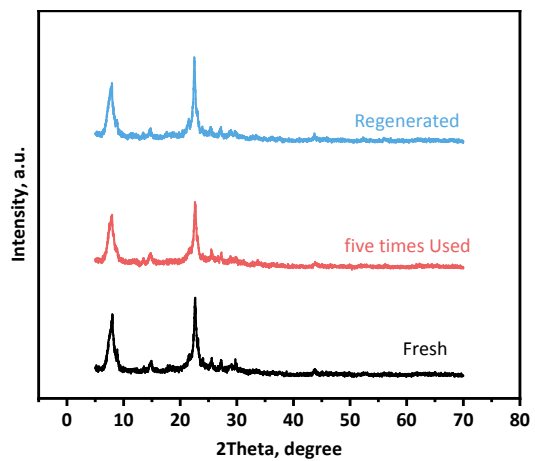

Figure S8. XRD patterns of the fresh, used and regenerated Sn-Beta catalyst by calcination at 550 °C for 3 h.

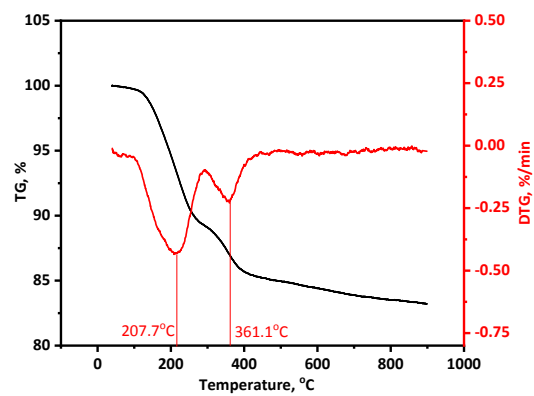

Figure S9. TG and DTG signals of deAl-Beta pre-adsorbed with 16.6 wt% GVL.

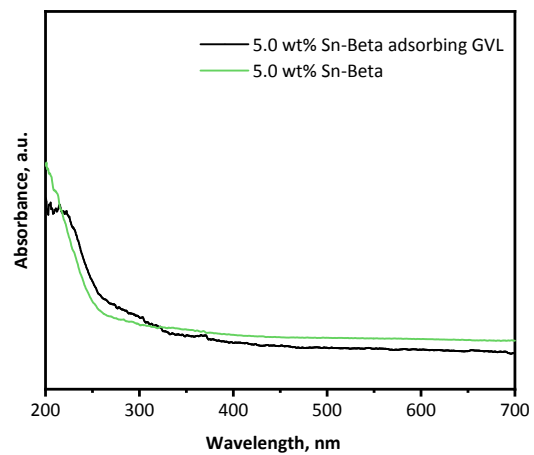

**Figure S10. UV-vis spectroscopy of 5.0 wt% Sn-Beta and 5.0 wt% Sn-Beta catalyst pre-adsorbed with 16.6 wt% GVL.**

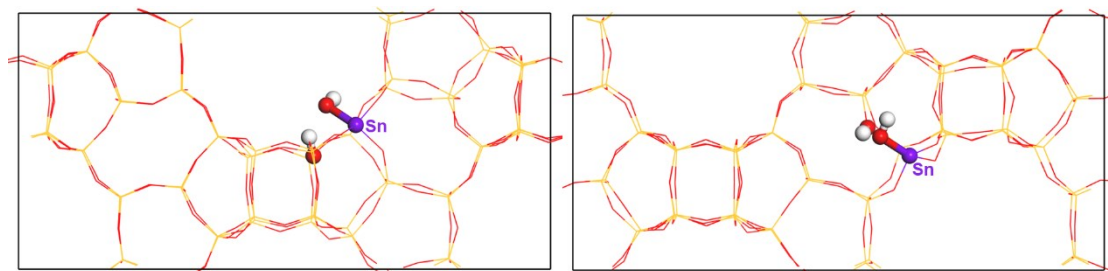

**Figure S11. Optimized structure of the open Sn site in the Sn-Beta catalyst model.**

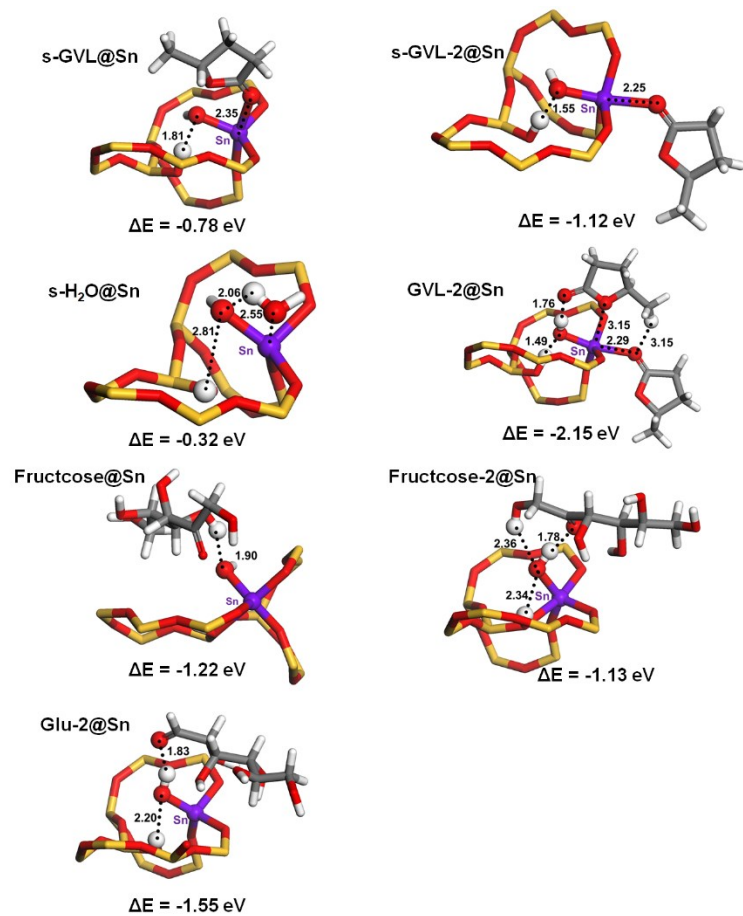

Figure S12. Other possible adsorption configuration of GVL, water, glucose, and fructose



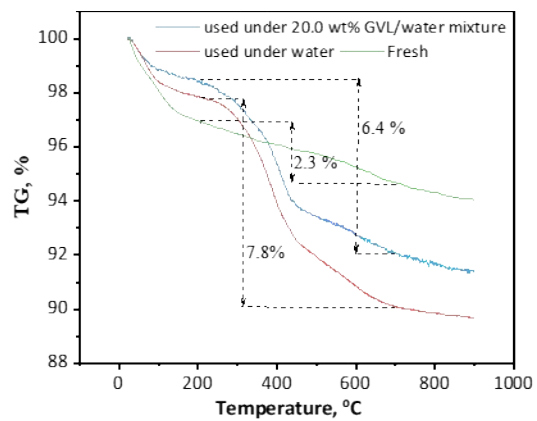

**Figure S13.** TG profile of fresh 0.75 wt% Sn-Beta and 0.75 wt% Sn-Beta after five runs under water and 20.0 wt% GVL/water mixture under a flowing air atmosphere.

**3. List of DFT-optimized fractional coordinates of the isolated molecules and the catalyst models with and without adsorbates.**

**Coordinates of the optimized structures of the open Sn sites**

open Sn site

CONTCAR

1.0

|               |               |               |
|---------------|---------------|---------------|
| 12.6569995880 | 0.0000000000  | 0.0000000000  |
| 0.0000000000  | 12.6569995880 | 0.0000000000  |
| 0.0000000000  | 0.0000000000  | 26.3959999084 |

O Si Sn H

129 63 1 2

Cartesian

|              |              |              |
|--------------|--------------|--------------|
| 4.106943190  | 8.311598336  | 1.752958292  |
| 4.366411736  | 10.359374468 | 0.066253960  |
| 3.274239218  | 10.735793331 | 2.413386297  |
| 5.876644993  | 10.256599627 | 2.196675049  |
| 4.441467826  | 6.488863732  | 26.240791476 |
| 3.046919543  | 5.922083466  | 2.039090897  |
| 5.697801635  | 6.182564438  | 2.124350122  |
| 8.998367330  | 8.402476038  | 1.755070086  |
| 10.770726563 | 10.403927257 | 1.852207319  |
| 8.380705856  | 10.751235472 | 2.823052188  |
| 10.689848645 | 6.357863927  | 1.557627929  |

|              |              |              |
|--------------|--------------|--------------|
| 8.302738475  | 6.012454577  | 2.630889321  |
| 12.461069463 | 8.369440917  | 1.565810690  |
| 0.606143711  | 10.670356799 | 2.561203842  |
| 0.431477130  | 6.023212926  | 2.576513466  |
| 9.091776097  | 4.019483370  | 14.667465875 |
| 8.781932934  | 1.870577967  | 13.140456408 |
| 9.786012300  | 1.661231120  | 15.591589309 |
| 7.189808956  | 2.183458975  | 15.201456828 |
| 8.866734569  | 6.085991651  | 12.933512357 |
| 9.479333157  | 6.498610032  | 15.475975154 |
| 6.723398076  | 8.245149378  | 14.946735640 |
| 3.558135753  | 4.130864966  | 15.011932622 |
| 2.157005945  | 1.950063988  | 14.656907297 |
| 4.594997133  | 1.821342329  | 15.771082001 |
| 1.951582815  | 6.201423706  | 14.596460181 |
| 4.211237048  | 6.491015327  | 15.991753306 |
| 0.426287739  | 4.030368461  | 14.765129975 |
| 12.465625382 | 1.671356703  | 15.775833440 |
| 12.170717391 | 6.366850530  | 15.697700587 |
| 4.359703469  | 3.694198444  | 8.277257819  |
| 2.384072513  | 4.229589725  | 6.567324634  |
| 1.952468688  | 2.735050961  | 8.722294595  |
| 2.363314947  | 5.376693533  | 8.907066576  |

|              |              |              |
|--------------|--------------|--------------|
| 6.311919240  | 4.163013648  | 6.510309332  |
| 6.824654278  | 2.866683911  | 8.756080946  |
| 6.258886438  | 5.489467403  | 8.780365205  |
| 4.330339337  | 8.894706804  | 8.481034769  |
| 2.172700626  | 10.397725204 | 8.091693670  |
| 1.950823307  | 8.007451014  | 9.188711274  |
| 6.488863732  | 10.440379128 | 8.194902164  |
| 6.665555495  | 8.055800779  | 9.345239725  |
| 4.326541984  | 11.946056089 | 7.982150186  |
| 2.174346007  | 0.105685944  | 9.265259789  |
| 6.482535691  | 0.238457873  | 9.168914135  |
| 8.614607245  | 8.469178480  | 21.873309582 |
| 10.179012472 | 8.357163552  | 19.707781436 |
| 10.885146569 | 9.812465141  | 21.841898165 |
| 10.922231394 | 7.137661462  | 21.864335341 |
| 6.861739104  | 9.137594042  | 20.014766880 |
| 6.293819669  | 9.659569167  | 22.470914752 |
| 6.340777159  | 7.131206679  | 21.750303950 |
| 8.515123166  | 3.751534812  | 21.516171283 |
| 10.617450362 | 2.102580680  | 21.532008364 |
| 10.787814084 | 4.563860877  | 22.528721830 |
| 6.421529090  | 2.138020313  | 21.411642769 |
| 6.138518239  | 4.557912307  | 22.337350541 |

|              |              |              |
|--------------|--------------|--------------|
| 8.523603556  | 0.473498335  | 21.440678468 |
| 10.781738772 | 12.366648270 | 22.603423263 |
| 6.207499017  | 12.364749405 | 22.430529093 |
| 8.234263910  | 8.534234786  | 24.872158330 |
| 8.701307746  | 10.525307505 | 0.192690804  |
| 9.913848085  | 10.463667949 | 24.243670379 |
| 7.295621076  | 11.018804182 | 24.460117309 |
| 8.496137534  | 6.420896135  | 0.033786879  |
| 9.898026474  | 6.499242987  | 24.212258961 |
| 7.250562074  | 6.210916145  | 24.101396245 |
| 3.867093232  | 8.528919171  | 24.612422958 |
| 2.195736340  | 10.562519073 | 24.900402646 |
| 4.628158618  | 11.010450534 | 23.967303397 |
| 2.255730515  | 6.402543458  | 24.723021356 |
| 4.633854082  | 6.227497076  | 23.614653791 |
| 0.553617169  | 8.440952761  | 24.806168393 |
| 12.498154289 | 10.755791390 | 23.744785009 |
| 12.487142834 | 6.117127906  | 23.742409290 |
| 4.258700751  | 4.228830028  | 11.386970070 |
| 4.383498503  | 2.322812617  | 13.228882735 |
| 3.055526297  | 1.906650366  | 10.995781888 |
| 5.712736808  | 2.016766241  | 11.005811830 |
| 4.368436966  | 6.034098017  | 13.382508403 |

|              |              |              |
|--------------|--------------|--------------|
| 3.157288524  | 6.621129448  | 11.099253914 |
| 5.823991662  | 6.371407202  | 11.256838065 |
| 8.749024555  | 3.926580816  | 11.443457915 |
| 10.710606400 | 2.129793406  | 11.324940190 |
| 8.269830097  | 1.507068953  | 10.552856513 |
| 10.730604458 | 5.707927029  | 11.072858254 |
| 8.295271266  | 6.280782984  | 10.334826032 |
| 0.033667619  | 3.947718043  | 11.457975764 |
| 0.469068405  | 1.512638052  | 10.582684380 |
| 0.552351448  | 6.377735243  | 10.605385088 |
| 8.611316483  | 3.759508611  | 18.109239998 |
| 10.571126204 | 4.189593609  | 19.897832706 |
| 11.031208289 | 2.886681969  | 17.627248983 |
| 10.607831559 | 5.511490314  | 17.661827502 |
| 6.587714856  | 4.262117878  | 19.751334196 |
| 6.109280471  | 3.317019884  | 17.343227779 |
| 7.026026759  | 5.818929154  | 17.596893266 |
| 8.340456256  | 8.855975843  | 17.837888773 |
| 10.422279935 | 10.510499074 | 18.228814210 |
| 10.772625428 | 8.105036228  | 17.132587989 |
| 6.584298106  | 10.829582324 | 17.976467169 |
| 5.682486614  | 8.388679279  | 17.761340258 |
| 8.635997201  | 12.505748240 | 18.303249751 |

|              |              |              |
|--------------|--------------|--------------|
| 11.085633366 | 0.224914880  | 17.393907698 |
| 6.385962904  | 0.656518564  | 17.226820668 |
| 4.419191432  | 8.445256704  | 4.785594766  |
| 2.536589206  | 8.173890264  | 6.640705655  |
| 2.095492942  | 9.718297432  | 4.556741389  |
| 2.194344065  | 7.070706290  | 4.284334857  |
| 6.223446617  | 8.202368712  | 6.749193438  |
| 6.743143405  | 9.696021037  | 4.644640258  |
| 6.644924482  | 7.023875165  | 4.455380764  |
| 4.318188713  | 3.689388665  | 4.819117585  |
| 2.212063788  | 2.069799231  | 5.025270648  |
| 1.941077385  | 4.450454052  | 3.967582609  |
| 6.382671387  | 2.008032933  | 4.927077518  |
| 6.673656414  | 4.427165231  | 3.900800897  |
| 4.277939113  | 0.381481961  | 5.080965931  |
| 1.942722954  | 12.329816174 | 4.021958660  |
| 6.503292692  | 12.238432259 | 3.897897327  |
| 12.655733678 | 10.499360877 | 26.381745591 |
| 0.158085920  | 6.303818699  | 26.350862811 |
| 12.612067328 | 1.940191512  | 13.171339976 |
| 12.398037255 | 6.005113356  | 13.119075719 |
| 2.158271477  | 12.624091209 | 6.632259264  |
| 6.452032391  | 12.546756783 | 6.536705385  |

|              |              |              |
|--------------|--------------|--------------|
| 10.668584676 | 12.550301029 | 19.980979743 |
| 6.459626342  | 0.053285967  | 19.818117089 |
| 6.994004819  | 5.649325129  | 14.738998633 |
| 4.408053234  | 9.905873908  | 1.613851456  |
| 4.331478505  | 6.725422929  | 1.445708922  |
| 9.213283087  | 10.010294131 | 1.643942855  |
| 9.129873349  | 6.804908949  | 1.483191208  |
| 12.286782024 | 9.979664088  | 1.480815587  |
| 12.251722805 | 6.767824123  | 1.405850917  |
| 6.864144182  | 10.738198409 | 3.395845249  |
| 8.698649184  | 2.423182569  | 14.667728620 |
| 8.656122001  | 5.567561149  | 14.451810327 |
| 3.664960676  | 2.555701391  | 14.667728620 |
| 3.508520455  | 5.730076682  | 14.762491510 |
| 0.600954319  | 2.419005745  | 14.587485940 |
| 0.419579519  | 5.644768833  | 14.558712987 |
| 6.086624606  | 2.001198113  | 16.393764385 |
| 2.763149561  | 4.016698821  | 8.130495778  |
| 5.940942356  | 4.058213954  | 8.086150849  |
| 2.753403639  | 8.879897619  | 8.088790100  |
| 5.926640139  | 8.911920314  | 8.181704334  |
| 2.709357251  | 11.928209625 | 7.989805195  |
| 5.942967586  | 11.958206713 | 7.966840955  |



|              |              |              |
|--------------|--------------|--------------|
| 2.011323884  | 6.576323929  | 9.940469962  |
| 10.150786753 | 8.454622778  | 21.320577192 |
| 7.026406985  | 8.587014481  | 21.514851264 |
| 10.124207169 | 3.646228528  | 21.366769990 |
| 6.919961156  | 3.673567431  | 21.231885760 |
| 10.143572273 | 0.554882844  | 21.376537187 |
| 6.913000160  | 0.597916663  | 21.279662896 |
| 11.002729841 | 6.073461179  | 23.090692780 |
| 8.533602585  | 10.128004145 | 25.025519679 |
| 8.476392960  | 6.923251918  | 24.881925526 |
| 3.751154963  | 10.104968808 | 24.983022619 |
| 3.792923203  | 6.918063045  | 24.806432711 |
| 0.653860615  | 10.055479875 | 24.959265424 |
| 0.701324365  | 6.825539962  | 24.908585505 |
| 6.120165562  | 11.021082518 | 23.327728231 |
| 4.354514219  | 2.619239435  | 11.642219894 |
| 4.385776840  | 5.806018833  | 11.769976179 |
| 9.137974268  | 2.353062811  | 11.627965577 |
| 9.171388105  | 5.495415973  | 11.441610046 |
| 12.275517839 | 2.382173837  | 11.646707015 |
| 12.259063273 | 5.510984101  | 11.576229957 |
| 6.808073724  | 1.663256350  | 9.858642157  |
| 10.195466284 | 4.092640972  | 18.321464126 |

|              |              |              |
|--------------|--------------|--------------|
| 7.069313639  | 4.321479476  | 18.195554137 |
| 9.922454462  | 8.965838423  | 18.225118472 |
| 6.852119546  | 9.282390607  | 18.403819781 |
| 10.195466284 | 12.093889933 | 18.490925302 |
| 7.020963874  | 12.340827629 | 18.340732627 |
| 10.769081181 | 6.612523071  | 16.487205683 |
| 2.813904215  | 8.347797478  | 5.052194552  |
| 6.005240097  | 8.337292235  | 5.148011962  |
| 2.721254957  | 3.605346350  | 5.099707369  |
| 5.920817933  | 3.563071897  | 5.044011693  |
| 2.663159269  | 0.525265463  | 5.191301191  |
| 5.899174494  | 0.467169870  | 5.113960900  |
| 1.914624355  | 5.882720304  | 3.211601316  |
| 1.980187628  | 10.843378329 | 3.382911344  |
| 6.816680101  | 5.918792704  | 3.274159832  |
| 11.072596303 | 1.630727820  | 16.595692679 |
| 1.926015658  | 1.581238981  | 9.876854958  |
| 6.749851672  | 6.541896911  | 9.918032786  |
| 11.008045456 | 10.841226734 | 23.105738480 |
| 6.102952053  | 6.051691374  | 22.956072869 |
| 6.061690404  | 7.036658744  | 16.375550011 |
| 6.542909338  | 9.170881892  | 15.199872491 |
| 6.484940015  | 5.945878877  | 13.950549238 |

H<sub>2</sub>O@open Sn site

CONTCAR

1.0

|               |               |               |
|---------------|---------------|---------------|
| 12.6569995880 | 0.0000000000  | 0.0000000000  |
| 0.0000000000  | 12.6569995880 | 0.0000000000  |
| 0.0000000000  | 0.0000000000  | 26.3959999084 |

O Si Sn H

131 63 1 6

Cartesian

|              |              |              |
|--------------|--------------|--------------|
| 4.296291790  | 8.315395312  | 1.741872059  |
| 4.249967255  | 10.432278964 | 0.117990121  |
| 3.381443990  | 10.669723844 | 2.567802954  |
| 5.959548140  | 10.361146591 | 2.094258723  |
| 4.437417367  | 6.489369945  | 26.210700078 |
| 3.011859570  | 6.033465062  | 2.014542713  |
| 5.676158196  | 6.039034161  | 2.081324622  |
| 9.005961281  | 8.421714399  | 1.695942989  |
| 10.815785565 | 10.389118072 | 1.924268320  |
| 8.425005162  | 10.725035360 | 2.880859463  |
| 10.695797215 | 6.385709420  | 1.503780122  |
| 8.299320971  | 6.022453606  | 2.565691159  |
| 12.505621498 | 8.375642971  | 1.548917318  |
| 0.707399724  | 10.691747510 | 2.466706254  |

|              |             |              |
|--------------|-------------|--------------|
| 0.414010468  | 6.029035131 | 2.576513466  |
| 9.126962058  | 4.004548198 | 14.647140100 |
| 8.758390629  | 1.888424431 | 13.088456470 |
| 9.611725615  | 1.598325843 | 15.589213590 |
| 7.090577607  | 2.254211687 | 15.105375493 |
| 9.095193601  | 6.112318127 | 12.948821588 |
| 9.406555404  | 6.510254443 | 15.492603618 |
| 6.249266880  | 7.934040305 | 15.448259475 |
| 3.365242907  | 4.037329834 | 14.421718929 |
| 2.036764299  | 1.863616594 | 14.760907173 |
| 4.502348063  | 1.964872607 | 15.748117761 |
| 1.866654250  | 6.215852665 | 14.598835900 |
| 4.060871762  | 5.904869957 | 16.081234546 |
| 0.368824959  | 4.041886130 | 14.824521390 |
| 12.291465438 | 1.695531585 | 15.718817744 |
| 12.107052982 | 6.431780848 | 15.689782046 |
| 4.258194538  | 3.855068973 | 8.373867005  |
| 2.450901320  | 4.260219391 | 6.450654385  |
| 1.868046524  | 2.732646261 | 8.542009735  |
| 2.088025167  | 5.399729247 | 8.751857357  |
| 6.176615868  | 4.197946879 | 6.543304301  |
| 6.677326648  | 2.834155380 | 8.747370236  |
| 6.300021723  | 5.479341632 | 8.844508059  |

|              |              |              |
|--------------|--------------|--------------|
| 4.395902611  | 8.902806969  | 8.378881976  |
| 2.242693830  | 10.432152222 | 8.184343585  |
| 2.092455097  | 8.022765658  | 9.290071898  |
| 6.573918851  | 10.412533635 | 8.102515780  |
| 6.712259879  | 8.059344270  | 9.294295487  |
| 4.416280140  | 11.942638585 | 7.987165944  |
| 2.315091735  | 0.188462727  | 9.298519076  |
| 6.626952030  | 0.184285915  | 9.114538478  |
| 8.644857062  | 8.394881332  | 21.988659419 |
| 10.061428445 | 8.393109209  | 19.710948538 |
| 10.817304959 | 9.886889031  | 21.805208244 |
| 11.003489538 | 7.210565957  | 21.833450987 |
| 7.085388734  | 9.478953686  | 20.209833908 |
| 6.317108490  | 9.586791413  | 22.677596059 |
| 6.317614703  | 7.205503072  | 21.632578393 |
| 8.465886963  | 3.848107599  | 21.467602765 |
| 10.538977522 | 2.160423260  | 21.543095580 |
| 10.742881824 | 4.636765373  | 22.491767591 |
| 6.437097218  | 2.148905403  | 21.681146911 |
| 6.102192733  | 4.651447439  | 22.326264899 |
| 8.498289129  | 0.452108002  | 21.465491363 |
| 10.806419491 | 12.433476700 | 22.591016028 |
| 6.188513385  | 12.268556089 | 22.376680499 |

|              |              |              |
|--------------|--------------|--------------|
| 8.257552731  | 8.624226049  | 24.937092566 |
| 8.781299979  | 10.619602711 | 0.232812722  |
| 9.875497350  | 10.561379905 | 24.218330419 |
| 7.275749760  | 11.108035748 | 24.551447205 |
| 8.501706633  | 6.436970476  | 26.370395630 |
| 9.914987253  | 6.606700488  | 24.168968946 |
| 7.265750731  | 6.357990668  | 24.015871915 |
| 3.826337418  | 8.583850461  | 24.669174335 |
| 2.146247407  | 10.611881264 | 24.877438406 |
| 4.610818367  | 11.053484684 | 24.018776271 |
| 2.263704315  | 6.419376741  | 24.673924201 |
| 4.638663861  | 6.366217575  | 23.560013815 |
| 0.555642305  | 8.450192848  | 24.780037051 |
| 12.468409931 | 10.750096304 | 23.705719369 |
| 12.490180112 | 6.117507755  | 23.729739310 |
| 4.665370186  | 4.159849628  | 11.720615492 |
| 4.213135536  | 1.915510228  | 13.144944316 |
| 3.033503009  | 2.261805827  | 10.839517755 |
| 5.664513408  | 1.810457239  | 10.979416169 |
| 4.242119820  | 6.264835008  | 13.380397002 |
| 3.239685458  | 6.274580931  | 10.951172640 |
| 5.847660331  | 6.488737745  | 11.282970194 |
| 8.775097925  | 3.980626422  | 11.430787935 |

|              |              |              |
|--------------|--------------|--------------|
| 10.721997327 | 2.170042630  | 11.289569502 |
| 8.278943441  | 1.585542264  | 10.498745174 |
| 10.775536719 | 5.719445075  | 10.954604060 |
| 8.325141612  | 6.348751336  | 10.374947373 |
| 0.073663739  | 3.982145061  | 11.389873640 |
| 0.495268375  | 1.546685316  | 10.536755113 |
| 0.609561121  | 6.470385068  | 10.699354236 |
| 8.498162387  | 3.994675533  | 18.138011377 |
| 10.542647756 | 4.207945908  | 19.867476989 |
| 10.835277410 | 2.927184299  | 17.567593249 |
| 10.610616108 | 5.584394810  | 17.680833259 |
| 6.412036274  | 4.058973274  | 19.780898531 |
| 6.057893051  | 3.412200397  | 17.279877880 |
| 6.658973970  | 5.936639168  | 17.891473049 |
| 8.199584163  | 8.936980503  | 17.861645969 |
| 10.289634748 | 10.565177634 | 18.250722750 |
| 10.641625622 | 8.167055255  | 17.122556473 |
| 6.503166705  | 10.973871921 | 18.071230058 |
| 5.522375405  | 8.571826579  | 18.337036888 |
| 8.570054456  | 12.630293263 | 18.323575527 |
| 11.012855612 | 0.264025006  | 17.392587679 |
| 6.316222429  | 0.762963922  | 17.182740844 |
| 4.356665814  | 8.414753403  | 4.847097583  |

|              |              |              |
|--------------|--------------|--------------|
| 2.451787382  | 8.198824466  | 6.696137013  |
| 1.995375908  | 9.634508223  | 4.550406399  |
| 2.168903462  | 6.990840799  | 4.360355129  |
| 6.295085202  | 8.170093288  | 6.680299932  |
| 6.613156026  | 9.770950385  | 4.608741720  |
| 6.619737551  | 7.118802571  | 4.307563415  |
| 4.344894661  | 3.666479693  | 4.682122347  |
| 2.242313982  | 2.045750902  | 4.996762800  |
| 1.964239841  | 4.397168143  | 3.851704136  |
| 6.425578795  | 2.045750902  | 4.959544243  |
| 6.747446594  | 4.478173180  | 3.974973693  |
| 4.324517132  | 0.392113851  | 5.056153822  |
| 1.965125714  | 12.272606548 | 4.081085364  |
| 6.558983679  | 12.312475923 | 3.843257745  |
| 12.583209408 | 10.495690643 | 26.343208588 |
| 0.189728425  | 6.311286285  | 26.337928512 |
| 12.615611574 | 1.999046519  | 13.125938559 |
| 12.306147882 | 5.959295034  | 13.123034989 |
| 2.240921707  | 12.631052960 | 6.667365633  |
| 6.510254443  | 12.536505025 | 6.486288998  |
| 10.628588560 | 12.610295204 | 19.975965559 |
| 6.406086949  | 0.307058802  | 19.813101331 |
| 7.028179108  | 5.571484489  | 14.565840145 |



|              |              |              |
|--------------|--------------|--------------|
| 3.671162730  | 8.733456427  | 16.358128592 |
| 3.859372161  | 6.483294634  | 18.741159369 |
| 4.468300516  | 9.928277045  | 1.634176346  |
| 4.361348851  | 6.719347617  | 1.423536261  |
| 9.254291630  | 10.028773550 | 1.674034253  |
| 9.132531156  | 6.822755413  | 1.429343401  |
| 12.315513956 | 9.984347503  | 1.469465331  |
| 12.265392068 | 6.777949895  | 1.387901648  |
| 6.878573141  | 10.793383183 | 3.368657420  |
| 8.628403250  | 2.446597943  | 14.612032944 |
| 8.639035234  | 5.551866279  | 14.413007433 |
| 3.542061412  | 2.440396078  | 14.531525945 |
| 3.400682729  | 5.636415185  | 14.639221559 |
| 0.516405602  | 2.432675385  | 14.590653041 |
| 0.338574741  | 5.654261272  | 14.566104464 |
| 6.016757766  | 2.107770118  | 16.322758691 |
| 2.669487876  | 4.065554799  | 8.045236553  |
| 5.855634131  | 4.094918931  | 8.133399348  |
| 2.794665477  | 8.899009993  | 8.127592208  |
| 5.994355007  | 8.892807940  | 8.110170789  |
| 2.800487682  | 11.955674893 | 8.035206611  |
| 6.032452636  | 11.934284937 | 7.920383838  |
| 2.023347954  | 6.528733862  | 9.918824954  |

|              |              |              |
|--------------|--------------|--------------|
| 10.139269084 | 8.486265247  | 21.324272930 |
| 7.082477443  | 8.658020866  | 21.603805440 |
| 10.075604675 | 3.707741342  | 21.340110011 |
| 6.865662821  | 3.668504922  | 21.291012857 |
| 10.113701927 | 0.600701213  | 21.379704288 |
| 6.890723765  | 0.627154337  | 21.333775808 |
| 11.013488567 | 6.135100735  | 23.059281363 |
| 8.543474873  | 10.221286925 | 25.075672535 |
| 8.493099501  | 7.016281214  | 24.848929771 |
| 3.698248526  | 10.161166008 | 25.018921158 |
| 3.787100998  | 6.968184179  | 24.795874133 |
| 0.616142740  | 10.067124285 | 24.933925464 |
| 0.709424812  | 6.835032778  | 24.889317003 |
| 6.113077824  | 11.024626010 | 23.406652466 |
| 4.398687160  | 2.554562223  | 11.660169163 |
| 4.497285177  | 5.777667127  | 11.842565424 |
| 9.146453903  | 2.405842506  | 11.591539189 |
| 9.236951379  | 5.541740886  | 11.436858607 |
| 12.291844910 | 2.425334352  | 11.593387058 |
| 12.269442528 | 5.535791939  | 11.553001399 |
| 6.799972805  | 1.622247619  | 9.832510029  |
| 10.106993660 | 4.179594579  | 18.299291268 |
| 6.916290922  | 4.391092832  | 18.253361214 |

|              |              |              |
|--------------|--------------|--------------|
| 9.803858764  | 9.015201368  | 18.229605592 |
| 6.825413975  | 9.469334128  | 18.602580973 |
| 10.116359735 | 12.159199723 | 18.497261078 |
| 6.952616805  | 12.509292486 | 18.348386849 |
| 10.696050698 | 6.664290340  | 16.472159983 |
| 2.750492536  | 8.304510598  | 5.105514116  |
| 5.965876936  | 8.362605909  | 5.103666640  |
| 2.754542807  | 3.583449803  | 5.004681734  |
| 5.924741651  | 3.590284435  | 5.052458477  |
| 2.709737100  | 0.509191075  | 5.206082965  |
| 5.946385090  | 0.497293511  | 5.090468416  |
| 1.903739264  | 5.880695075  | 3.201570784  |
| 2.007400167  | 10.800344179 | 3.415114537  |
| 6.822502684  | 5.919298917  | 3.232982005  |
| 10.918180935 | 1.651738493  | 16.559529823 |
| 1.935381733  | 1.684899790  | 9.796611491  |
| 6.780734444  | 6.576070446  | 9.948388503  |
| 10.979693749 | 10.897676663 | 23.081454221 |
| 6.101812885  | 6.162060167  | 22.899321491 |
| 5.284803783  | 7.104879825  | 17.024628055 |
| 7.120447953  | 8.272361917  | 15.739143519 |
| 6.648215244  | 6.491522294  | 14.679342900 |
| 3.850639042  | 9.445032881  | 17.007470955 |

|             |             |              |
|-------------|-------------|--------------|
| 3.524974268 | 5.577433437 | 18.592286713 |
| 4.357425133 | 6.486205925 | 19.583720103 |
| 4.045683482 | 9.055956427 | 15.512138011 |

GVL@open Sn site

CONTCAR

1.0

|               |               |               |
|---------------|---------------|---------------|
| 12.6569995880 | 0.0000000000  | 0.0000000000  |
| 0.0000000000  | 12.6569995880 | 0.0000000000  |
| 0.0000000000  | 0.0000000000  | 26.3959999084 |

O Si Sn H C

133 63 1 18 10

Cartesian

|              |              |              |
|--------------|--------------|--------------|
| 4.398687160  | 8.377161610  | 1.787273082  |
| 4.358944150  | 10.501133000 | 0.177909042  |
| 3.400809093  | 10.701366313 | 2.597366305  |
| 6.003847823  | 10.457719379 | 2.197467021  |
| 4.498677452  | 6.527467952  | 26.271411512 |
| 3.092358205  | 6.109027365  | 2.090299256  |
| 5.757922175  | 6.099787655  | 2.140451718  |
| 9.075195543  | 8.469051738  | 1.759557403  |
| 10.865401240 | 10.452529752 | 1.958055261  |
| 8.487657144  | 10.775663461 | 2.942889932  |

|              |              |              |
|--------------|--------------|--------------|
| 10.773637854 | 6.436590250  | 1.565018816  |
| 8.376908881  | 6.068525035  | 2.626402003  |
| 12.566502112 | 8.438168212  | 1.608572265  |
| 0.729043164  | 10.747817967 | 2.586807923  |
| 0.496027836  | 6.097889168  | 2.635904488  |
| 9.289098874  | 3.993410000  | 14.659283016 |
| 8.818511547  | 1.906017600  | 13.092152209 |
| 9.732726392  | 1.570480538  | 15.561233592 |
| 7.201832838  | 2.279525549  | 15.142856795 |
| 9.161136346  | 6.148137420  | 13.053085782 |
| 9.563375850  | 6.468359461  | 15.601092188 |
| 6.414946811  | 7.702417253  | 15.787447719 |
| 3.378153227  | 4.175797227  | 14.377108895 |
| 2.106251290  | 2.019297684  | 14.921922744 |
| 4.602717826  | 2.174725667  | 15.810940596 |
| 1.971327767  | 6.409757938  | 14.603851658 |
| 4.124662913  | 5.918919446  | 16.137458860 |
| 0.485649053  | 4.236044508  | 14.945678367 |
| 12.368166910 | 1.956392406  | 15.927346133 |
| 12.256532207 | 6.646190392  | 15.775042058 |
| 4.304265967  | 3.994549168  | 8.412141263  |
| 2.444826008  | 4.309581959  | 6.524563256  |
| 1.929432974  | 2.814790088  | 8.651553219  |

|              |              |              |
|--------------|--------------|--------------|
| 2.104605909  | 5.483392092  | 8.815735893  |
| 6.281415939  | 4.260725604  | 6.633314965  |
| 6.669859438  | 2.881998743  | 8.848467329  |
| 6.401150806  | 5.543259525  | 8.926862927  |
| 4.486779935  | 8.984065112  | 8.469684809  |
| 2.320913941  | 10.498094967 | 8.256140662  |
| 2.193837664  | 8.097821748  | 9.379290394  |
| 6.648722212  | 10.493158823 | 8.162962896  |
| 6.825920188  | 8.134273618  | 9.342336155  |
| 4.481084094  | 12.021997863 | 8.085358680  |
| 2.352429856  | 0.254785391  | 9.374539741  |
| 6.675554525  | 0.240482984  | 9.244934801  |
| 8.719280197  | 8.479177509  | 22.034589472 |
| 10.158887671 | 8.524489241  | 19.766644214 |
| 10.929952087 | 9.922454462  | 21.906568082 |
| 11.055636278 | 7.245625930  | 21.858263883 |
| 7.121713863  | 9.529581787  | 20.266585285 |
| 6.365078406  | 9.578311023  | 22.750184517 |
| 6.431654106  | 7.221830896  | 21.689592516 |
| 8.539297672  | 3.898862065  | 21.627826954 |
| 10.610742095 | 2.202571160  | 21.596151218 |
| 10.862870174 | 4.674356412  | 22.554854745 |
| 6.540251530  | 2.159410646  | 21.906303764 |

|              |              |              |
|--------------|--------------|--------------|
| 6.142062108  | 4.685494609  | 22.389350479 |
| 8.578281362  | 0.468562144  | 21.546262681 |
| 10.892234307 | 12.482332677 | 22.664926079 |
| 6.249393622  | 12.245140526 | 22.378264837 |
| 8.337165493  | 8.662830268  | 24.983549683 |
| 8.805095013  | 10.659091860 | 0.291939769  |
| 9.972449608  | 10.608590501 | 24.310980335 |
| 7.361944047  | 11.146133754 | 24.569660006 |
| 8.585749326  | 6.483674859  | 0.031675201  |
| 9.980297043  | 6.644165539  | 24.210411879 |
| 7.329162410  | 6.382291916  | 24.088197628 |
| 3.884686212  | 8.636630156  | 24.756808493 |
| 2.237757498  | 10.689088948 | 24.960849761 |
| 4.689545068  | 11.095252169 | 24.072360547 |
| 2.334710134  | 6.469625371  | 24.713782796 |
| 4.708530323  | 6.433552971  | 23.609638034 |
| 0.654240322  | 8.524235757  | 24.861072687 |
| 12.560806272 | 10.825278381 | 23.795466501 |
| 12.566248628 | 6.214460391  | 23.771709306 |
| 4.811431906  | 4.243005882  | 11.800331896 |
| 4.236044508  | 2.006640658  | 13.227827034 |
| 3.255506693  | 2.307750702  | 10.835029848 |
| 5.857026405  | 1.878805062  | 11.177122448 |

|              |              |              |
|--------------|--------------|--------------|
| 4.344768297  | 6.384317522  | 13.431341239 |
| 3.313096167  | 6.292427395  | 11.010299737 |
| 5.912211179  | 6.607206701  | 11.328371610 |
| 8.884581033  | 4.042772191  | 11.481995705 |
| 10.852744403 | 2.245858039  | 11.377995829 |
| 8.425384633  | 1.673002273  | 10.486075194 |
| 10.854895997 | 5.816017862  | 11.047253976 |
| 8.406905968  | 6.426844705  | 10.474988765 |
| 0.167452101  | 4.099222497  | 11.519742112 |
| 0.677022930  | 1.653004214  | 10.754786380 |
| 0.687021959  | 6.582525983  | 10.795699890 |
| 8.512085133  | 4.540698421  | 18.259432672 |
| 10.575429393 | 4.270851375  | 19.949041262 |
| 10.604793526 | 3.002113647  | 17.640974663 |
| 10.880336412 | 5.654134908  | 17.775858893 |
| 6.527720681  | 3.869624297  | 19.876715548 |
| 6.269644787  | 3.549022785  | 17.300993464 |
| 6.272049488  | 6.025871111  | 18.335716869 |
| 8.222493512  | 8.949384610  | 17.945848706 |
| 10.235462401 | 10.683393862 | 18.255209870 |
| 10.680609312 | 8.256540305  | 17.192770786 |
| 6.720234056  | 11.119680158 | 18.161504254 |
| 5.491998846  | 8.835092101  | 18.331229749 |



|              |              |              |
|--------------|--------------|--------------|
| 8.666627244  | 0.236053054  | 18.388774081 |
| 11.118034777 | 0.376292593  | 17.480487729 |
| 6.352042099  | 0.885483668  | 17.248730781 |
| 4.433747133  | 8.473354927  | 4.898569670  |
| 2.556207604  | 8.258185686  | 6.777172649  |
| 2.071571166  | 9.692224062  | 4.635401698  |
| 2.241934322  | 7.045898830  | 4.442974709  |
| 6.358243398  | 8.233884439  | 6.746553400  |
| 6.688211361  | 9.841323815  | 4.693472701  |
| 6.707196993  | 7.195504042  | 4.362466923  |
| 4.407547021  | 3.769887489  | 4.809879025  |
| 2.330786416  | 2.102833975  | 5.051138458  |
| 2.039802144  | 4.456656106  | 3.911887326  |
| 6.477725535  | 2.123717906  | 5.027118124  |
| 6.808579937  | 4.553482000  | 4.054953629  |
| 4.404129517  | 0.436413368  | 5.135341589  |
| 2.048662005  | 12.325765715 | 4.153410684  |
| 6.663277159  | 12.383355566 | 3.953856929  |
| 0.031262788  | 10.572392114 | 0.036954399  |
| 0.264278160  | 6.374950694  | 26.393097125 |
| 0.011138160  | 2.154980715  | 13.304111231 |
| 12.366142057 | 6.105230389  | 13.217005711 |
| 2.313572907  | 0.046071479  | 6.742330598  |

|              |              |              |
|--------------|--------------|--------------|
| 6.580247647  | 12.650164579 | 6.600319996  |
| 10.707188896 | 12.638520169 | 20.049345399 |
| 6.488611003  | 0.471852954  | 19.879619905 |
| 7.162342934  | 5.528450717  | 14.748237193 |
| 3.186020078  | 4.808773722  | 18.954439197 |
| 3.502571508  | 7.034380407  | 18.806886560 |
| 4.580188325  | 9.678807528  | 14.824257072 |
| 3.440931952  | 8.637009627  | 16.458169984 |
| 4.536901446  | 9.993586835  | 1.698054587  |
| 4.442353888  | 6.779089063  | 1.482927283  |
| 9.304667001  | 10.079022180 | 1.727618135  |
| 9.208853156  | 6.871105178  | 1.488998348  |
| 12.375381389 | 10.047885924 | 1.544957851  |
| 12.340321416 | 6.838956496  | 1.447028745  |
| 6.951224153  | 10.866160936 | 3.455764121  |
| 8.734215370  | 2.456470419  | 14.624967242 |
| 8.750036981  | 5.544271951  | 14.520703047 |
| 3.602814907  | 2.602911988  | 14.610450180 |
| 3.485990954  | 5.765769610  | 14.685942995 |
| 0.592853872  | 2.622783493  | 14.753780014 |
| 0.449829760  | 5.839939638  | 14.643972998 |
| 6.132442928  | 2.244845424  | 16.375814329 |
| 2.704421107  | 4.152002193  | 8.118090117  |

|              |              |              |
|--------------|--------------|--------------|
| 5.914489515  | 4.174151845  | 8.215227153  |
| 2.887061629  | 8.968243501  | 8.207308612  |
| 6.081814827  | 8.967610546  | 8.175632876  |
| 2.864025915  | 12.028579388 | 8.114394378  |
| 6.098522123  | 12.016934978 | 8.019633062  |
| 2.093341159  | 6.599359267  | 9.998277040  |
| 10.213945703 | 8.556891406  | 21.380759989 |
| 7.145382909  | 8.693206827  | 21.644192673 |
| 10.138510142 | 3.753559664  | 21.425105705 |
| 6.944136415  | 3.661796656  | 21.421409966 |
| 10.189137488 | 0.636900212  | 21.449389964 |
| 6.970842740  | 0.668163021  | 21.420618584 |
| 11.084873669 | 6.190032402  | 23.103627079 |
| 8.614607245  | 10.261029558 | 25.126616772 |
| 8.561574066  | 7.053113310  | 24.901986983 |
| 3.784569555  | 10.219767531 | 25.089398215 |
| 3.860258223  | 7.020457661  | 24.855792611 |
| 0.710437380  | 10.141926892 | 25.019976858 |
| 0.786632544  | 6.907304319  | 24.947915463 |
| 6.183577242  | 11.033866097 | 23.442288259 |
| 4.542470544  | 2.638984387  | 11.758098368 |
| 4.592971903  | 5.861329971  | 11.911723249 |
| 9.261886335  | 2.469127444  | 11.627437727 |

|              |              |              |
|--------------|--------------|--------------|
| 9.318082780  | 5.611860455  | 11.533996429 |
| 12.404366051 | 2.541272431  | 11.745691920 |
| 12.345257560 | 5.652615891  | 11.656209893 |
| 6.896925819  | 1.689076614  | 9.935190673  |
| 10.110537907 | 4.360715896  | 18.386661107 |
| 6.877940186  | 4.552722680  | 18.421503945 |
| 9.821831970  | 9.107470967  | 18.282661231 |
| 6.856802960  | 9.576665642  | 18.652996574 |
| 10.166735106 | 12.278302389 | 18.551901054 |
| 7.051467929  | 0.017846370  | 18.417281142 |
| 10.834012255 | 6.749471446  | 16.567185618 |
| 2.831497384  | 8.361340753  | 5.181006931  |
| 6.041565603  | 8.427283498  | 5.168072632  |
| 2.810739818  | 3.650784823  | 5.084661277  |
| 5.993975158  | 3.671162730  | 5.142996598  |
| 2.789602780  | 0.566527301  | 5.276560416  |
| 6.023592775  | 0.572476107  | 5.183910500  |
| 1.980946948  | 5.945372287  | 3.272048235  |
| 2.060432968  | 10.850845538 | 3.491926978  |
| 6.899963097  | 5.984609084  | 3.297388391  |
| 10.934128534 | 1.759702584  | 16.644261197 |
| 2.053851255  | 1.764385810  | 9.899027816  |
| 6.874143211  | 6.657455331  | 10.017545541 |

|              |              |              |
|--------------|--------------|--------------|
| 11.070571451 | 10.950202875 | 23.168561315 |
| 6.176109655  | 6.201170222  | 22.951585748 |
| 5.081785166  | 7.236259856  | 17.246090743 |
| 7.228918634  | 8.050611151  | 16.203448797 |
| 6.786809756  | 6.421022122  | 15.105111174 |
| 1.480109521  | 6.948186120  | 20.608676312 |
| 0.545263521  | 4.742957341  | 20.166015255 |
| 3.305628580  | 3.443969608  | 20.498869296 |
| 1.377334680  | 4.334389419  | 21.684049694 |
| 2.867949444  | 6.265721070  | 21.478161343 |
| 2.634807563  | 2.225733428  | 18.427575403 |
| 1.129890393  | 3.187538718  | 18.329909730 |
| 1.366196577  | 2.037397254  | 19.667660096 |
| 1.765904638  | 10.721364372 | 15.940809068 |
| 3.398784241  | 12.257544633 | 14.962837040 |
| 4.115423580  | 10.134206199 | 12.864354531 |
| 2.501909081  | 11.877454782 | 13.475949700 |
| 1.691861163  | 9.744624286  | 14.461575951 |
| 6.442286091  | 10.869451699 | 13.332091229 |
| 5.854874811  | 12.024782413 | 14.563993063 |
| 5.464153353  | 12.280580725 | 12.847725281 |
| 3.010467295  | 6.049159932  | 19.382583191 |
| 2.176497601  | 6.100673717  | 20.632960571 |

|             |              |              |
|-------------|--------------|--------------|
| 1.525041876 | 4.716883971  | 20.666483389 |
| 2.498997978 | 3.843930775  | 19.862725550 |
| 1.877033127 | 2.761251073  | 19.015150631 |
| 3.486370425 | 9.476042395  | 15.543547855 |
| 2.357366188 | 10.362665231 | 15.089536838 |
| 3.093750480 | 11.442687125 | 14.290794756 |
| 4.337427075 | 10.707821851 | 13.780823743 |
| 5.602747487 | 11.514831924 | 13.622975273 |

Glu@open Sn site

CONTCAR

1.0

|               |               |               |
|---------------|---------------|---------------|
| 12.6569995880 | 0.0000000000  | 0.0000000000  |
| 0.0000000000  | 12.6569995880 | 0.0000000000  |
| 0.0000000000  | 0.0000000000  | 26.3959999084 |

O Si Sn H C

135 63 1 14 6

Cartesian

|             |              |              |
|-------------|--------------|--------------|
| 4.291861859 | 8.338051932  | 1.707557269  |
| 4.284141166 | 10.465440072 | 0.095553522  |
| 3.335119455 | 10.681242267 | 2.516066744  |
| 5.937018639 | 10.389244814 | 2.108776376  |
| 4.425266743 | 6.496078212  | 26.195654378 |
| 3.045400715 | 6.039540374  | 2.030644309  |

|              |              |              |
|--------------|--------------|--------------|
| 5.707040968  | 6.078524064  | 2.048593578  |
| 9.017479704  | 8.412854538  | 1.686704430  |
| 10.798446068 | 10.410129311 | 1.861973925  |
| 8.419436063  | 10.714909589 | 2.868453408  |
| 10.718327093 | 6.386975330  | 1.493485665  |
| 8.317167435  | 6.013213897  | 2.549325638  |
| 12.503343916 | 8.399817476  | 1.538886786  |
| 0.663226783  | 10.706809424 | 2.518706389  |
| 0.445652936  | 6.047640915  | 2.545366367  |
| 9.184551909  | 4.094033247  | 14.624440178 |
| 8.729912181  | 1.953734410  | 13.136761456 |
| 9.658303257  | 1.700088258  | 15.616402205 |
| 7.130446982  | 2.406095613  | 15.198025408 |
| 9.034312988  | 6.220155854  | 12.976009417 |
| 9.576286171  | 6.554174277  | 15.503955152 |
| 5.810322399  | 7.861135810  | 15.369599558 |
| 3.327018913  | 4.031380887  | 14.291059074 |
| 2.065369112  | 1.867793418  | 14.784135731 |
| 4.524497716  | 2.069672489  | 15.760523422 |
| 1.958544189  | 6.266100918  | 14.591180105 |
| 4.131497921  | 5.717166739  | 16.075164662 |
| 0.436160215  | 4.097450374  | 14.855932808 |
| 12.341587326 | 1.796534492  | 15.787974783 |

|              |              |              |
|--------------|--------------|--------------|
| 12.262607519 | 6.507722623  | 15.763427778 |
| 4.266801293  | 3.913037918  | 8.379674145  |
| 2.448496619  | 4.271104481  | 6.460685114  |
| 1.886146095  | 2.754922467  | 8.564181807  |
| 2.067394342  | 5.423018068  | 8.753969545  |
| 6.184336561  | 4.205414843  | 6.539872880  |
| 6.669352471  | 2.849470402  | 8.755553095  |
| 6.353433996  | 5.503516515  | 8.816528061  |
| 4.425266743  | 8.914957592  | 8.359613474  |
| 2.281677332  | 10.451137854 | 8.202292854  |
| 2.139286034  | 8.034283326  | 9.311452588  |
| 6.590246676  | 10.432911919 | 8.080343709  |
| 6.743522876  | 8.083392788  | 9.283736909  |
| 4.445264802  | 11.999594727 | 8.060282252  |
| 2.288638705  | 0.210359344  | 9.313036925  |
| 6.724790728  | 0.199474324  | 9.098701396  |
| 8.653843665  | 8.473354927  | 21.929532322 |
| 10.155216683 | 8.509933539  | 19.700654277 |
| 10.872869203 | 9.910177852  | 21.850081024 |
| 11.001717415 | 7.237019553  | 21.798608149 |
| 7.014635833  | 9.401113047  | 20.113752572 |
| 6.296730583  | 9.592107028  | 22.595767467 |
| 6.370141292  | 7.183353419  | 21.632841138 |



|              |              |              |
|--------------|--------------|--------------|
| 8.486265247  | 3.714576351  | 21.866711060 |
| 10.616058465 | 2.173080286  | 21.418769928 |
| 10.856541379 | 4.646511295  | 22.415483394 |
| 6.362926812  | 2.147386575  | 21.627562636 |
| 6.064601318  | 4.646004705  | 22.303300659 |
| 8.500820949  | 0.546149536  | 21.420354266 |
| 10.751867672 | 12.466132349 | 22.612397504 |
| 6.213953800  | 12.275264356 | 22.340254898 |
| 8.286537392  | 8.600557757  | 24.884828310 |
| 8.718015041  | 10.591630476 | 0.219614720  |
| 9.922581204  | 10.560240736 | 24.263994581 |
| 7.305240634  | 11.080190254 | 24.481234466 |
| 8.537399561  | 6.431021151  | 26.350334174 |
| 9.904355269  | 6.558856937  | 24.111161868 |
| 7.252207455  | 6.324702818  | 24.026694812 |
| 3.848993661  | 8.607266023  | 24.659142820 |
| 2.181433934  | 10.649219573 | 24.846818370 |
| 4.636005676  | 11.069432283 | 23.984197752 |
| 2.265349696  | 6.463550059  | 24.634858561 |
| 4.635119992  | 6.384064039  | 23.535729556 |
| 0.562350477  | 8.507781945  | 24.748625634 |
| 12.496255424 | 10.846795833 | 23.724989444 |
| 12.508786273 | 6.174590639  | 23.691729370 |

|              |             |              |
|--------------|-------------|--------------|
| 4.741818173  | 4.134155729 | 11.692371963 |
| 4.256169309  | 1.890955685 | 13.151542837 |
| 3.038312788  | 2.270286028 | 10.867761284 |
| 5.655906654  | 1.755905609 | 10.957243312 |
| 4.316922803  | 6.229015715 | 13.363766965 |
| 3.266897996  | 6.231167310 | 10.947213370 |
| 5.874113550  | 6.486459409 | 11.252878795 |
| 8.798386746  | 4.049607200 | 11.487274994 |
| 10.723263237 | 2.214468677 | 11.357935158 |
| 8.288182774  | 1.660724907 | 10.535171562 |
| 10.792750228 | 5.801335796 | 11.038806798 |
| 8.361593482  | 6.388114498 | 10.370196720 |
| 0.070879195  | 4.034924756 | 11.441346514 |
| 0.492357273  | 1.603262175 | 10.570277932 |
| 0.638798747  | 6.508735803 | 10.738948512 |
| 8.513983998  | 4.199086047 | 17.772427473 |
| 10.165215712 | 4.280597297 | 19.870908409 |
| 10.858313502 | 2.982875097 | 17.648893204 |
| 10.766043903 | 5.642869968 | 17.738376018 |
| 6.850980378  | 4.070490943 | 19.817061388 |
| 6.013340639  | 3.403593643 | 17.440893452 |
| 6.514304902  | 5.985495146 | 18.006822886 |
| 8.242364829  | 8.833067248 | 17.848183034 |

|              |              |              |
|--------------|--------------|--------------|
| 10.190150669 | 10.639600769 | 18.160975617 |
| 10.767183071 | 8.225657533  | 17.158192267 |
| 6.751876524  | 11.005387648 | 18.000224364 |
| 5.484024669  | 8.759150326  | 18.071230058 |
| 8.619289905  | 0.188842434  | 18.335981188 |
| 11.065635307 | 0.332879090  | 17.417664893 |
| 6.317741445  | 0.785493376  | 17.156343611 |
| 4.369069544  | 8.406019530  | 4.849208984  |
| 2.459761370  | 8.217936840  | 6.706167742  |
| 2.023221401  | 9.650076351  | 4.555421763  |
| 2.168143953  | 7.008054308  | 4.363786549  |
| 6.325209032  | 8.178320194  | 6.670797054  |
| 6.608093140  | 9.793606251  | 4.612173140  |
| 6.644924482  | 7.147913975  | 4.281695212  |
| 4.342743067  | 3.680528804  | 4.686873786  |
| 2.246490806  | 2.056129591  | 5.006265285  |
| 1.964113287  | 4.412736271  | 3.860150920  |
| 6.432793275  | 2.067267789  | 4.943442843  |
| 6.733650589  | 4.503613596  | 3.964151189  |
| 4.336414649  | 0.407681955  | 5.030549544  |
| 1.972973149  | 12.284124217 | 4.092171793  |
| 6.586955914  | 12.334499588 | 3.842465576  |
| 12.650164579 | 10.536572444 | 26.361421389 |

|              |              |              |
|--------------|--------------|--------------|
| 0.196183490  | 6.360269005  | 26.307045732 |
| 12.632318115 | 2.048408898  | 13.172132144 |
| 12.349434761 | 6.021820652  | 13.182162086 |
| 2.285601050  | 12.641051989 | 6.680827782  |
| 6.503292692  | 12.560426800 | 6.483385428  |
| 10.650358741 | 12.555996870 | 19.989691239 |
| 6.403808613  | 0.283643358  | 19.777202793 |
| 7.109309755  | 5.692485643  | 14.770674369 |
| 0.393379548  | 3.231458552  | 20.091844033 |
| 3.846209112  | 4.135294897  | 19.879091268 |
| 1.690215782  | 4.722832918  | 18.001808702 |
| 3.982651651  | 6.502407008  | 18.994297792 |
| 2.868582399  | 7.972897254  | 17.137866491 |
| 1.079135739  | 1.437835163  | 22.179503644 |
| 4.459187548  | 9.952958518  | 1.618074750  |
| 4.373373110  | 6.738839462  | 1.410338234  |
| 9.237837818  | 10.023077709 | 1.653445339  |
| 9.152529215  | 6.815921159  | 1.416673323  |
| 12.316020169 | 10.009535188 | 1.470785153  |
| 12.281719893 | 6.800605760  | 1.372592024  |
| 6.878192916  | 10.810090479 | 3.370505290  |
| 8.656375485  | 2.550638505  | 14.652682921 |
| 8.689157122  | 5.652236420  | 14.470814510 |

|              |              |              |
|--------------|--------------|--------------|
| 3.562312577  | 2.455457992  | 14.514104526 |
| 3.465359941  | 5.611734090  | 14.616784383 |
| 0.562350477  | 2.486214400  | 14.623647223 |
| 0.433755372  | 5.710711578  | 14.599891601 |
| 6.025238156  | 2.180041659  | 16.370007190 |
| 2.672398979  | 4.093020444  | 8.058963020  |
| 5.868544451  | 4.119220556  | 8.133927198  |
| 2.821245249  | 8.913185469  | 8.139470806  |
| 6.022959820  | 8.909388494  | 8.098556510  |
| 2.825548626  | 11.981875005 | 8.066881561  |
| 6.060424494  | 11.962003688 | 7.930942417  |
| 2.044232074  | 6.538479407  | 9.939149943  |
| 10.164709499 | 8.545246996  | 21.312658651 |
| 7.077287815  | 8.652451768  | 21.536232739 |
| 10.032824009 | 3.705083535  | 21.378384269 |
| 6.935149812  | 3.650911565  | 21.367561372 |
| 10.121296633 | 0.615003619  | 21.355420029 |
| 6.884648453  | 0.644874106  | 21.287845755 |
| 11.033359883 | 6.147757949  | 23.012297182 |
| 8.552587463  | 10.198124091 | 25.052706721 |
| 8.501073678  | 6.987423294  | 24.822269793 |
| 3.730270843  | 10.187366120 | 25.000444038 |
| 3.797100027  | 6.991473754  | 24.778452714 |

|              |              |              |
|--------------|--------------|--------------|
| 0.645380414  | 10.124081182 | 24.932869764 |
| 0.714993911  | 6.891736191  | 24.863184089 |
| 6.131556866  | 11.017158801 | 23.350429725 |
| 4.425266743  | 2.535703333  | 11.663600584 |
| 4.542470544  | 5.752606183  | 11.827783257 |
| 9.146453903  | 2.470266612  | 11.644331295 |
| 9.243659646  | 5.615910537  | 11.484635743 |
| 12.296274840 | 2.476215371  | 11.640899875 |
| 12.292225135 | 5.595406265  | 11.612128496 |
| 6.824654278  | 1.636676578  | 9.837261468  |
| 10.065605646 | 4.269965313  | 18.249929794 |
| 6.965020158  | 4.465769073  | 18.235677050 |
| 9.825881675  | 9.054437788  | 18.200834213 |
| 6.855790534  | 9.459588583  | 18.490133919 |
| 10.118891555 | 12.226914591 | 18.479048277 |
| 7.015521517  | 12.562831879 | 18.311432610 |
| 10.828189672 | 6.718841404  | 16.508585585 |
| 2.762643348  | 8.314256144  | 5.116336619  |
| 5.980685367  | 8.373491377  | 5.099707369  |
| 2.753530192  | 3.596359747  | 5.016031695  |
| 5.924741651  | 3.608763854  | 5.048762738  |
| 2.725051932  | 0.521721500  | 5.213210124  |
| 5.957143439  | 0.518936997  | 5.083077726  |

|              |              |              |
|--------------|--------------|--------------|
| 1.921079326  | 5.894491457  | 3.205002401  |
| 1.997527691  | 10.814520409 | 3.421713452  |
| 6.836678160  | 5.938537656  | 3.216880605  |
| 10.953367650 | 1.732363493  | 16.599388418 |
| 1.932977032  | 1.710720053  | 9.824063638  |
| 6.817566540  | 6.596574717  | 9.932550635  |
| 10.995009148 | 10.941596498 | 23.111545619 |
| 6.104091221  | 6.154339474  | 22.884804429 |
| 5.106466638  | 7.083996082  | 17.099065170 |
| 6.259139545  | 8.713964582  | 15.509233654 |
| 6.654164569  | 6.591005619  | 14.832439931 |
| 2.247376867  | 2.316737117  | 19.893345585 |
| 2.598102397  | 4.958126582  | 21.254322936 |
| 0.789670200  | 5.609202647  | 19.673729980 |
| 2.375592312  | 7.272458997  | 20.041426859 |
| 3.808744438  | 3.600916419  | 19.056064927 |
| 0.968133897  | 4.064036160  | 18.074132842 |
| 1.014331973  | 7.764689764  | 17.927107269 |
| 12.539289574 | 2.483809510  | 20.468513579 |
| 4.209338183  | 5.571864338  | 19.342724596 |
| 2.866304062  | 2.561397043  | 22.303300659 |
| 1.319998501  | 3.416757070  | 22.603158944 |
| 1.677432203  | 0.676390069  | 22.081573653 |

|             |             |              |
|-------------|-------------|--------------|
| 1.745273625 | 3.085903045 | 20.518402116 |
| 2.486214400 | 4.419571280 | 20.296676683 |
| 1.788813799 | 5.349734101 | 19.278318996 |
| 2.573927515 | 6.670365652 | 19.127597685 |
| 2.093088052 | 7.519523436 | 17.976467169 |
| 1.813748001 | 2.649869478 | 21.982325216 |

s-GVL@open Sn site

CONTCAR

1.0

|               |               |               |
|---------------|---------------|---------------|
| 12.6569995880 | 0.0000000000  | 0.0000000000  |
| 0.0000000000  | 12.6569995880 | 0.0000000000  |
| 0.0000000000  | 0.0000000000  | 26.3959999084 |

O Si Sn H C

131 63 1 10 5

Cartesian

|             |              |              |
|-------------|--------------|--------------|
| 4.371854093 | 8.408297866  | 1.936674572  |
| 4.329580017 | 10.491260713 | 0.268975234  |
| 3.455993867 | 10.775536719 | 2.716412274  |
| 6.030807254 | 10.462402793 | 2.262401060  |
| 4.499436772 | 6.601131390  | 26.378314171 |
| 3.101471173 | 6.116115480  | 2.186116667  |
| 5.765136655 | 6.141429153  | 2.234685381  |
| 9.093042007 | 8.535500696  | 1.888633707  |



|              |              |              |
|--------------|--------------|--------------|
| 10.895271585 | 10.513916579 | 2.070238193  |
| 8.503225272  | 10.860211612 | 3.020494345  |
| 10.775157248 | 6.492914192  | 1.702541904  |
| 8.379060475  | 6.148137420  | 2.767092587  |
| 12.578779478 | 8.487531157  | 1.732897425  |
| 0.782329166  | 10.813001016 | 2.616635397  |
| 0.501470335  | 6.139530666  | 2.748615467  |
| 9.207587246  | 4.022267920  | 14.839040026 |
| 8.805474484  | 1.920573113  | 13.274548470 |
| 9.712222120  | 1.616425413  | 15.748117761 |
| 7.166646123  | 2.280538164  | 15.307832424 |
| 9.254671855  | 6.123329960  | 13.125147177 |
| 9.412124502  | 6.540504259  | 15.677640703 |
| 6.802631367  | 8.080734981  | 15.393355181 |
| 3.491180204  | 4.187441637  | 14.831648549 |
| 2.114098725  | 2.002337281  | 14.893678428 |
| 4.572594374  | 1.981706456  | 15.934208973 |
| 1.916902502  | 6.322930695  | 14.752724314 |
| 4.076819738  | 6.258886438  | 16.318798634 |
| 0.405277113  | 4.146812942  | 14.884439869 |
| 12.381329959 | 1.817038952  | 15.902797556 |
| 12.114140720 | 6.539872059  | 15.724097820 |
| 4.386536159  | 3.785455617  | 8.459126230  |

|              |              |              |
|--------------|--------------|--------------|
| 2.483936252  | 4.351349821  | 6.657862755  |
| 1.932470630  | 2.866683911  | 8.784324475  |
| 2.425081056  | 5.513389179  | 8.979655034  |
| 6.341156631  | 4.305152028  | 6.714086282  |
| 6.840855361  | 2.939714771  | 8.922903657  |
| 6.291921182  | 5.558068333  | 9.043269251  |
| 4.448049351  | 9.000392183  | 8.570781115  |
| 2.282310098  | 10.530749862 | 8.342983438  |
| 2.128274390  | 8.136172483  | 9.444224630  |
| 6.624926424  | 10.518219767 | 8.318171328  |
| 6.769090033  | 8.139463246  | 9.465077469  |
| 4.454504511  | 12.005796781 | 8.111754340  |
| 2.381541071  | 0.281238539  | 9.448448219  |
| 6.583538409  | 0.299844322  | 9.320427616  |
| 8.713078143  | 8.531576979  | 22.108497950 |
| 10.183062176 | 8.456014676  | 19.864309887 |
| 10.914004488 | 9.976373326  | 21.951178117 |
| 11.061078635 | 7.301569646  | 22.020335155 |
| 7.053239298  | 9.479333157  | 20.321225261 |
| 6.395708449  | 9.724120014  | 22.796112997 |
| 6.410643622  | 7.282837498  | 21.858790946 |
| 8.533475844  | 3.858612842  | 21.637592578 |
| 10.656814278 | 2.243706256  | 21.648415475 |

|              |              |              |
|--------------|--------------|--------------|
| 10.800597663 | 4.717516926  | 22.636681763 |
| 6.440134496  | 2.254211687  | 21.666628276 |
| 6.199398476  | 4.714352528  | 22.497046094 |
| 8.561574066  | 0.608042246  | 21.612781255 |
| 10.848187731 | 12.522582278 | 22.747280161 |
| 6.269264939  | 12.425249794 | 22.576234647 |
| 8.322483804  | 8.699535622  | 25.085702477 |
| 8.857368495  | 10.699214719 | 0.376142999  |
| 9.962957547  | 10.620108924 | 24.369314476 |
| 7.362702989  | 11.194989732 | 24.699528479 |
| 8.582331821  | 6.545820629  | 0.169990243  |
| 9.964349444  | 6.661252307  | 24.339751714 |
| 7.313720270  | 6.408492028  | 24.233903182 |
| 3.912025492  | 8.665235346  | 24.795609814 |
| 2.228264870  | 10.686811366 | 25.028159717 |
| 4.695367273  | 11.150943156 | 24.182694626 |
| 2.322432769  | 6.517595664  | 24.848929771 |
| 4.701315843  | 6.403682626  | 23.740826525 |
| 0.606270264  | 8.542968660  | 24.918615447 |
| 12.547769964 | 10.862363961 | 23.857496381 |
| 12.541314426 | 6.188007172  | 23.910552020 |
| 4.558165414  | 4.333376993  | 11.816433296 |
| 4.317175910  | 2.150677338  | 13.355848424 |

|              |              |              |
|--------------|--------------|--------------|
| 3.076410229  | 2.264084163  | 11.074177486 |
| 5.730583272  | 2.025879397  | 11.158116692 |
| 4.337933288  | 6.346725729  | 13.623239592 |
| 3.172983393  | 6.551516469  | 11.296960192 |
| 5.822473023  | 6.631001735  | 11.447681504 |
| 8.807879562  | 4.008471915  | 11.603945637 |
| 10.765790419 | 2.204596201  | 11.468534343 |
| 8.322230321  | 1.598579138  | 10.698298535 |
| 10.804015167 | 5.731468957  | 11.057548236 |
| 8.318433345  | 6.393303371  | 10.602745050 |
| 0.113153577  | 4.019103522  | 11.551153530 |
| 0.539441316  | 1.586175219  | 10.702786442 |
| 0.601080920  | 6.463676801  | 10.668999305 |
| 8.563852402  | 4.144281500  | 18.203736996 |
| 10.561760130 | 4.323631070  | 20.010015441 |
| 10.869831170 | 2.958194001  | 17.762395958 |
| 10.763386095 | 5.616670234  | 17.782457415 |
| 6.551136244  | 4.309328475  | 19.907599902 |
| 6.125734661  | 3.451310830  | 17.468080494 |
| 6.708462903  | 6.031693316  | 17.828121577 |
| 8.276918589  | 8.924323666  | 18.041401405 |
| 10.337224816 | 10.617070891 | 18.381646923 |
| 10.701240326 | 8.217810098  | 17.257705022 |

|              |              |              |
|--------------|--------------|--------------|
| 6.629989309  | 10.987541184 | 18.171798515 |
| 5.580091244  | 8.577268936  | 18.350499824 |
| 8.651692071  | 0.050374859  | 18.445788204 |
| 11.122085236 | 0.305793105  | 17.553603251 |
| 6.367483485  | 0.790176507  | 17.364609255 |
| 4.433620391  | 8.582205080  | 5.021047059  |
| 2.523679074  | 8.307801361  | 6.849234044  |
| 2.063723731  | 9.766393713  | 4.713269840  |
| 2.267628032  | 7.119308784  | 4.511076440  |
| 6.354573164  | 8.293751872  | 6.855305502  |
| 6.737574307  | 9.846133217  | 4.758406938  |
| 6.646569863  | 7.185885239  | 4.505269301  |
| 4.426785760  | 3.802036171  | 4.931828564  |
| 2.328255162  | 2.160802920  | 5.164905137  |
| 2.050940152  | 4.521713166  | 4.050730040  |
| 6.488863732  | 2.140045542  | 5.136925533  |
| 6.817819269  | 4.562088754  | 4.122791042  |
| 4.394383594  | 0.487041328  | 5.251483988  |
| 2.049294771  | 12.396518616 | 4.220192396  |
| 6.624800436  | 12.396898087 | 4.035156490  |
| 0.012783570  | 10.586821074 | 0.096873320  |
| 0.254152554  | 6.427477660  | 0.115614475  |
| 0.016580669  | 2.030056221  | 13.292761271 |

|              |              |              |
|--------------|--------------|--------------|
| 12.438793069 | 6.092320069  | 13.168964256 |
| 2.275728574  | 0.080245375  | 6.816503394  |
| 6.582525983  | 12.639659337 | 6.679772081  |
| 10.678204234 | 12.653582084 | 20.132492437 |
| 6.489369945  | 0.256557373  | 19.974116903 |
| 7.097412616  | 5.558447804  | 14.576134406 |
| 4.647650086  | 9.498951745  | 13.873737977 |
| 4.127321097  | 9.010265224  | 16.013924591 |
| 4.543989561  | 10.019028005 | 1.793080222  |
| 4.440455023  | 6.817819269  | 1.587719426  |
| 9.335423031  | 10.142307117 | 1.825019490  |
| 9.213916042  | 6.936288980  | 1.619658596  |
| 12.393227853 | 10.095349250 | 1.620978320  |
| 12.342093539 | 6.889457855  | 1.564754891  |
| 6.962741822  | 10.891347868 | 3.526505497  |
| 8.698902667  | 2.464064747  | 14.807628608 |
| 8.726368689  | 5.556296210  | 14.563464426 |
| 3.629901080  | 2.587976626  | 14.768825713 |
| 3.462575392  | 5.798677612  | 14.901861288 |
| 0.577285744  | 2.530893554  | 14.739262952 |
| 0.391860697  | 5.761086573  | 14.645557336 |
| 6.083966421  | 2.143209751  | 16.526535641 |
| 2.803272231  | 4.132763454  | 8.231592871  |

|              |              |              |
|--------------|--------------|--------------|
| 5.970306866  | 4.158710459  | 8.288872098  |
| 2.849470402  | 9.002543777  | 8.283064959  |
| 6.048780083  | 8.994064141  | 8.291247818  |
| 2.841369860  | 12.050855783 | 8.173257156  |
| 6.071056478  | 12.033389544 | 8.098820829  |
| 2.095746048  | 6.647835773  | 10.088814767 |
| 10.220906699 | 8.578787575  | 21.479481362 |
| 7.133105544  | 8.739278255  | 21.752679669 |
| 10.141041207 | 3.782417584  | 21.483439846 |
| 6.931352837  | 3.783050539  | 21.394221351 |
| 10.180404369 | 0.693223871  | 21.521451359 |
| 6.948566346  | 0.725625801  | 21.461266988 |
| 11.068545844 | 6.207625382  | 23.227424093 |
| 8.621062028  | 10.295329834 | 25.217682350 |
| 8.551448295  | 7.086907373  | 25.028159717 |
| 3.782291219  | 10.238753163 | 25.161459610 |
| 3.852917378  | 7.050708232  | 24.949499801 |
| 0.692337857  | 10.158887671 | 25.076199598 |
| 0.766507885  | 6.928947759  | 25.049803938 |
| 6.194462332  | 11.141323598 | 23.556846714 |
| 4.431088948  | 2.712015247  | 11.838341836 |
| 4.478173180  | 5.943980012  | 12.051357345 |
| 9.190879950  | 2.435080086  | 11.780270439 |

|              |              |              |
|--------------|--------------|--------------|
| 9.284542201  | 5.565662284  | 11.600514216 |
| 12.336018228 | 2.463052132  | 11.764696890 |
| 12.313488349 | 5.579964879  | 11.631133465 |
| 6.855030837  | 1.732616599  | 10.019129879 |
| 10.165722680 | 4.259713178  | 18.435758262 |
| 6.972867593  | 4.536901446  | 18.341788327 |
| 9.874737653  | 9.059373931  | 18.386925425 |
| 6.867308202  | 9.473764059  | 18.710540906 |
| 10.187745591 | 12.211979418 | 18.644550970 |
| 7.037038969  | 12.518405077 | 18.496996760 |
| 10.753133582 | 6.721879437  | 16.601499819 |
| 2.827953327  | 8.437915482  | 5.258083296  |
| 6.039920222  | 8.470316893  | 5.271017201  |
| 2.828839388  | 3.701919137  | 5.203971564  |
| 6.019289209  | 3.694704657  | 5.232742943  |
| 2.778338029  | 0.619053843  | 5.362875341  |
| 6.016125188  | 0.590702183  | 5.274712546  |
| 1.990819424  | 5.992582884  | 3.369977439  |
| 2.082962470  | 10.919193361 | 3.560292634  |
| 6.892115662  | 6.017010873  | 3.402444557  |
| 11.003489538 | 1.704011787  | 16.741135488 |
| 1.988287981  | 1.760335539  | 9.986398442  |
| 6.791872641  | 6.659353442  | 10.135536203 |



|              |              |              |
|--------------|--------------|--------------|
| 11.056395220 | 10.987541184 | 23.229008430 |
| 6.170920028  | 6.217751153  | 23.085677023 |
| 5.603253700  | 7.368525572  | 16.814779647 |
| 7.717225684  | 8.057065934  | 15.748644824 |
| 6.775292087  | 6.496078212  | 14.511464488 |
| 2.636199838  | 11.254603681 | 15.620625008 |
| 3.727359930  | 12.228053759 | 13.669168072 |
| 3.496116348  | 9.570336846  | 12.161957317 |
| 2.305219259  | 11.586091038 | 12.821328835 |
| 1.846403085  | 10.001561012 | 14.648724437 |
| 5.852976323  | 10.084464536 | 11.533732111 |
| 5.822852494  | 11.552296975 | 12.557104769 |
| 4.792446274  | 11.454458278 | 11.110340343 |
| 3.903671844  | 9.635141178  | 14.968644180 |
| 2.767199832  | 10.601629505 | 14.748501511 |
| 3.160832581  | 11.311054365 | 13.451401123 |
| 4.076819738  | 10.296089531 | 12.756922449 |
| 5.210380270  | 10.873881629 | 11.945773918 |

s-GVL-2@open Sn site

CONTCAR

1.0

|               |              |              |
|---------------|--------------|--------------|
| 12.6569995880 | 0.0000000000 | 0.0000000000 |
|---------------|--------------|--------------|

0.000000000 12.6569995880 0.000000000

0.000000000 0.000000000 26.3959999084

O Si Sn H C

131 63 1 10 5

Cartesian

4.287558671 8.400577173 1.796511839

4.443366314 10.482653581 0.157320165

3.349168566 10.778067784 2.509731754

5.965370345 10.421520238 2.272695517

4.517916191 6.543542293 26.302558611

3.096155180 6.071689433 2.099273891

5.759820663 6.197753095 2.192715778

9.028617147 8.501833375 1.784369513

10.845782652 10.457972108 1.962278653

8.462976426 10.839581353 2.922829066

10.761487230 6.486838880 1.617018951

8.369947130 6.106622664 2.673650896

12.577007354 8.461964000 1.615171278

0.689173647 10.784649309 2.610564332

0.493876101 6.117887226 2.648574665

9.305046473 3.992777045 14.704155796

8.822308522 1.877919000 13.171867826

9.762723479 1.591617765 15.643324929

|              |              |              |
|--------------|--------------|--------------|
| 7.227020524  | 2.298890841  | 15.221253966 |
| 9.145568219  | 6.113837144  | 13.038567933 |
| 9.448196902  | 6.497217380  | 15.597660768 |
| 6.403302400  | 7.690772842  | 15.635406388 |
| 3.570286376  | 4.319454246  | 15.002166999 |
| 2.147766235  | 2.141817477  | 14.819242887 |
| 4.611198216  | 2.036890853  | 15.859771859 |
| 1.854756733  | 6.317235232  | 14.478997370 |
| 3.783683494  | 6.670618381  | 16.170981679 |
| 0.353510009  | 4.179847686  | 14.856459871 |
| 12.441577618 | 1.829822342  | 15.853701974 |
| 12.148947964 | 6.568349753  | 15.705356382 |
| 4.365019462  | 3.807225421  | 8.382313396  |
| 2.447990217  | 4.345021403  | 6.607975005  |
| 1.934875520  | 2.845420131  | 8.734436725  |
| 2.353315918  | 5.487822022  | 8.949563636  |
| 6.324829183  | 4.306670668  | 6.636218534  |
| 6.822502684  | 2.954143731  | 8.843715890  |
| 6.264455537  | 5.584774658  | 8.940589394  |
| 4.403623304  | 9.008619089  | 8.575796086  |
| 2.234846395  | 10.512397939 | 8.189622875  |
| 2.017652302  | 8.117060109  | 9.276610537  |
| 6.571893999  | 10.538217826 | 8.243998532  |

|              |              |              |
|--------------|--------------|--------------|
| 6.768710562  | 8.156170542  | 9.380082562  |
| 4.399193373  | 12.010732924 | 8.003267343  |
| 2.303953727  | 0.250102307  | 9.338640416  |
| 6.489750171  | 0.328196005  | 9.272914798  |
| 8.696751073  | 8.490821919  | 22.003705118 |
| 10.162305176 | 8.498668600  | 19.765061450 |
| 10.918434419 | 9.920429610  | 21.907623783 |
| 11.036144433 | 7.246258885  | 21.881228123 |
| 7.004003848  | 9.389341895  | 20.210889608 |
| 6.350649447  | 9.576286171  | 22.716133062 |
| 6.421529090  | 7.176645152  | 21.732353894 |
| 8.586128797  | 3.945440084  | 21.608029816 |
| 10.622766732 | 2.198014488  | 21.603014058 |
| 10.912105623 | 4.668660948  | 22.557493210 |
| 6.636951060  | 2.159410646  | 21.942202302 |
| 6.175223594  | 4.654611460  | 22.442670436 |
| 8.634478562  | 0.412491640  | 21.584801257 |
| 10.967923351 | 12.481320251 | 22.675483084 |
| 6.269391680  | 12.252481748 | 22.399117676 |
| 8.378680250  | 8.655489046  | 24.977742543 |
| 8.802310464  | 10.670104070 | 0.282437211  |
| 9.978398933  | 10.630614166 | 24.307284596 |
| 7.354476083  | 11.112845904 | 24.564381503 |

|              |              |              |
|--------------|--------------|--------------|
| 8.593216535  | 6.496331696  | 0.068629600  |
| 9.977386507  | 6.603156996  | 24.227831724 |
| 7.323719299  | 6.376596075  | 24.140988949 |
| 3.878864007  | 8.622454680  | 24.748361315 |
| 2.253072519  | 10.686557882 | 25.014434037 |
| 4.679546039  | 11.078671615 | 24.049394734 |
| 2.334330474  | 6.448614886  | 24.770798492 |
| 4.701822056  | 6.389506395  | 23.649232311 |
| 0.680819999  | 8.520312039  | 24.914392645 |
| 12.581564027 | 10.781738772 | 23.799689304 |
| 12.576501141 | 6.236483302  | 23.784907923 |
| 4.444252375  | 4.393244426  | 11.606849206 |
| 4.335402222  | 2.370529427  | 13.306751269 |
| 3.121469231  | 2.171561458  | 10.995517569 |
| 5.772857348  | 2.115364258  | 11.129345312 |
| 4.323504328  | 6.335967758  | 13.506832481 |
| 3.167414295  | 6.666441934  | 11.175802429 |
| 5.818929154  | 6.638596441  | 11.356615139 |
| 8.772946331  | 3.986574992  | 11.525285720 |
| 10.769840878 | 2.220543989  | 11.380107230 |
| 8.326154038  | 1.586934539  | 10.585587950 |
| 10.755285177 | 5.708686349  | 10.971497629 |
| 8.299953926  | 6.372672358  | 10.490297996 |

|              |              |              |
|--------------|--------------|--------------|
| 0.107711067  | 4.040620597  | 11.486219293 |
| 0.550579466  | 1.594402314  | 10.666095735 |
| 0.569565004  | 6.498610032  | 10.662927847 |
| 8.581319395  | 4.155546062  | 18.242804209 |
| 10.642891532 | 4.262624469  | 19.947456924 |
| 10.872615719 | 2.977938953  | 17.654173280 |
| 10.766803600 | 5.641731178  | 17.753421717 |
| 6.535821600  | 3.898735700  | 19.914198424 |
| 6.168262220  | 3.540922244  | 17.335309238 |
| 6.628597412  | 5.988279695  | 18.249667049 |
| 8.239326796  | 8.949638094  | 17.930538689 |
| 10.268876992 | 10.658965873 | 18.280285511 |
| 10.675546427 | 8.231226632  | 17.180627870 |
| 6.760356914  | 11.130312142 | 18.220631351 |
| 5.500985072  | 8.885213988  | 18.089707178 |
| 8.731051349  | 0.223269475  | 18.428104040 |
| 11.182332895 | 0.328196005  | 17.489461970 |
| 6.421655077  | 0.888901078  | 17.314192081 |
| 4.462605053  | 8.554992541  | 4.825716893  |
| 2.619365988  | 8.291094065  | 6.731244169  |
| 2.117389488  | 9.800694744  | 4.636193474  |
| 2.247503421  | 7.157406791  | 4.381735818  |
| 6.248760667  | 8.299701197  | 6.801721227  |

|              |              |              |
|--------------|--------------|--------------|
| 6.771368370  | 9.846006475  | 4.737818024  |
| 6.718461932  | 7.192086538  | 4.463827548  |
| 4.397421250  | 3.823932717  | 4.867158253  |
| 2.312307186  | 2.168270507  | 5.078854530  |
| 2.021196171  | 4.538546827  | 4.004009391  |
| 6.453551030  | 2.145108239  | 5.046651337  |
| 6.787063239  | 4.563227922  | 4.045450751  |
| 4.371474622  | 0.480080002  | 5.158834073  |
| 2.043725673  | 12.419427966 | 4.092963568  |
| 6.621889145  | 12.389810349 | 3.987379748  |
| 0.019998060  | 10.592896386 | 0.047512799  |
| 0.225168034  | 6.371913415  | 0.017157400  |
| 0.003923670  | 2.069672489  | 13.241025651 |
| 12.261847822 | 6.072448752  | 13.123299308 |
| 2.229783698  | 0.072144899  | 6.701944153  |
| 6.547086539  | 0.015314970  | 6.630939245  |
| 10.770473833 | 12.629154095 | 20.065446799 |
| 6.551262986  | 0.487421035  | 19.920532627 |
| 7.120321965  | 5.443649081  | 14.676967180 |
| 3.381064141  | 4.703974028  | 18.901647877 |
| 3.908228517  | 6.887559744  | 18.976612055 |
| 4.511840502  | 10.007763065 | 1.700430307  |
| 4.423241514  | 6.803896523  | 1.512754756  |

|              |              |              |
|--------------|--------------|--------------|
| 9.281504168  | 10.107753357 | 1.731313677  |
| 9.194424196  | 6.904393028  | 1.530440100  |
| 12.361079172 | 10.069402622 | 1.557364004  |
| 12.330575871 | 6.863511227  | 1.470785153  |
| 6.943123989  | 10.879323986 | 3.490870884  |
| 8.755606080  | 2.449888894  | 14.693597217 |
| 8.722191488  | 5.515667138  | 14.501170228 |
| 3.663315295  | 2.729608605  | 14.737414296 |
| 3.407517360  | 5.921830360  | 14.793638609 |
| 0.588170788  | 2.578863659  | 14.671160041 |
| 0.329335126  | 5.781084631  | 14.550003064 |
| 6.128899059  | 2.202824267  | 16.417520007 |
| 2.773654804  | 4.130358753  | 8.185663604  |
| 5.949296004  | 4.173012677  | 8.213907134  |
| 2.824662564  | 8.993937400  | 8.187775005  |
| 5.996253494  | 9.013049774  | 8.246638570  |
| 2.785805616  | 12.038072204 | 8.064505841  |
| 6.013087532  | 12.054526771 | 8.042069451  |
| 2.039928697  | 6.673529672  | 10.014642758 |
| 10.204452887 | 8.553347160  | 21.379704288 |
| 7.114246653  | 8.652704497  | 21.633105457 |
| 10.185720738 | 3.757103911  | 21.423521367 |
| 6.993498606  | 3.668251439  | 21.452557065 |



|              |              |              |
|--------------|--------------|--------------|
| 10.241791196 | 0.621205531  | 21.464435663 |
| 7.033621465  | 0.659429666  | 21.460211287 |
| 11.095252169 | 6.186108684  | 23.119992797 |
| 8.625745443  | 10.258118266 | 25.121072378 |
| 8.574104915  | 7.041975113  | 24.932605445 |
| 3.801403216  | 10.206477739 | 25.094676718 |
| 3.859245797  | 7.007927566  | 24.887996984 |
| 0.724233526  | 10.138129916 | 25.050859639 |
| 0.787138804  | 6.903001130  | 24.983814001 |
| 6.180159737  | 11.018804182 | 23.435423845 |
| 4.425140379  | 2.773401697  | 11.744371901 |
| 4.441974039  | 5.994101900  | 11.924656761 |
| 9.188095401  | 2.419385405  | 11.679438452 |
| 9.234293571  | 5.549587943  | 11.519214262 |
| 12.334752318 | 2.482164129  | 11.702402692 |
| 12.255139555 | 5.587052617  | 11.569894968 |
| 6.837944070  | 1.755905609  | 9.953667792  |
| 10.194200374 | 4.261232194  | 18.377686866 |
| 6.979702601  | 4.424760530  | 18.425464002 |
| 9.837906311  | 9.089497761  | 18.280549830 |
| 6.856423489  | 9.565400703  | 18.598620916 |
| 10.227994437 | 12.254760084 | 18.570905237 |
| 7.117410674  | 0.018732359  | 18.467696743 |

|              |              |              |
|--------------|--------------|--------------|
| 10.756677828 | 6.727828007  | 16.535509882 |
| 2.864911788  | 8.446142388  | 5.139565178  |
| 6.047767657  | 8.465380750  | 5.205027264  |
| 2.802133063  | 3.710778998  | 5.152499083  |
| 5.990178183  | 3.699640801  | 5.162001568  |
| 2.755302315  | 0.623104066  | 5.266001837  |
| 5.991950306  | 0.595764975  | 5.213210124  |
| 1.979554673  | 5.987899846  | 3.286829812  |
| 2.050054279  | 10.929698603 | 3.465003074  |
| 6.894647482  | 6.023212926  | 3.348596357  |
| 11.040574363 | 1.709201225  | 16.644525516 |
| 1.989300596  | 1.727047501  | 9.926479963  |
| 6.776557243  | 6.672896717  | 10.042094119 |
| 11.094619214 | 10.940963543 | 23.173575499 |
| 6.177755036  | 6.171299876  | 23.005961406 |
| 5.338849011  | 7.120954166  | 17.259025041 |
| 7.265750731  | 8.048206073  | 15.929194789 |
| 6.734409532  | 6.356978242  | 14.913475567 |
| 1.784636975  | 6.832881184  | 20.664636307 |
| 0.700058644  | 4.754095538  | 19.985731182 |
| 3.343219996  | 3.231711659  | 20.349732322 |
| 1.405939493  | 4.157444549  | 21.504292685 |
| 3.058943613  | 5.968281637  | 21.541511242 |

|             |             |              |
|-------------|-------------|--------------|
| 2.693789312 | 2.195736340 | 18.176285635 |
| 1.253296059 | 3.254241160 | 18.083900038 |
| 1.364930856 | 2.007779826 | 19.348004672 |
| 3.295882658 | 5.909679736 | 19.439597313 |
| 2.406981674 | 5.929044839 | 20.651174945 |
| 1.644144165 | 4.607021392 | 20.531865051 |
| 2.590887729 | 3.722170302 | 19.710157156 |
| 1.944747995 | 2.740240400 | 18.766499328 |

s-H<sub>2</sub>O@open Sn site

CONTCAR

1.0

|               |               |               |
|---------------|---------------|---------------|
| 12.6569995880 | 0.0000000000  | 0.0000000000  |
| 0.0000000000  | 12.6569995880 | 0.0000000000  |
| 0.0000000000  | 0.0000000000  | 26.3959999084 |

O Si Sn H

130 63 1 4

Cartesian

|             |              |              |
|-------------|--------------|--------------|
| 4.221489184 | 8.311092123  | 1.817100556  |
| 4.319834095 | 10.343679599 | 0.087634717  |
| 3.300818801 | 10.708454806 | 2.468553927  |
| 5.905249806 | 10.339882623 | 2.163680080  |
| 4.432481223 | 6.524936132  | 26.253725775 |

|              |              |              |
|--------------|--------------|--------------|
| 3.020339771  | 5.979546199  | 2.043842336  |
| 5.680461384  | 6.082700888  | 2.120126730  |
| 8.983052686  | 8.427916453  | 1.769587738  |
| 10.781358547 | 10.410129311 | 1.892329249  |
| 8.396653455  | 10.768195497 | 2.864757866  |
| 10.685545456 | 6.399125953  | 1.580328539  |
| 8.294511569  | 6.033844910  | 2.642503600  |
| 12.487142834 | 8.391590570  | 1.601181378  |
| 0.630318593  | 10.717820880 | 2.542198676  |
| 0.416288709  | 6.037008931  | 2.612940052  |
| 9.052919148  | 4.030115355  | 14.717090094 |
| 8.727000890  | 1.895512169  | 13.174243545 |
| 9.702982788  | 1.655662022  | 15.631974968 |
| 7.122346818  | 2.208013517  | 15.227061106 |
| 8.840407715  | 6.093206131  | 12.967563026 |
| 9.425920507  | 6.517342181  | 15.494979337 |
| 7.061592946  | 8.327926161  | 15.229699571 |
| 3.511431369  | 4.083148156  | 14.785455750 |
| 2.104226249  | 1.898423460  | 14.740318652 |
| 4.542723651  | 1.854883286  | 15.825457658 |
| 1.947659098  | 6.202056284  | 14.711547273 |
| 4.245410960  | 6.223699723  | 16.122148842 |
| 0.409453937  | 4.026950957  | 14.790207189 |

|              |              |              |
|--------------|--------------|--------------|
| 12.379431849 | 1.671989658  | 15.763163460 |
| 12.125152176 | 6.375963874  | 15.693213466 |
| 4.322871750  | 3.687616919  | 8.337704148  |
| 2.421157528  | 4.261105452  | 6.547791814  |
| 1.881589611  | 2.757960122  | 8.670558189  |
| 2.337241577  | 5.394666362  | 8.892020876  |
| 6.258126741  | 4.185163301  | 6.556766449  |
| 6.792252112  | 2.855039312  | 8.781157373  |
| 6.223573358  | 5.474531853  | 8.847675160  |
| 4.337553817  | 8.888630738  | 8.432729783  |
| 2.182699655  | 10.420634553 | 8.167450017  |
| 1.993857080  | 8.023019142  | 9.261564837  |
| 6.503166705  | 10.427595549 | 8.198333584  |
| 6.652012974  | 8.049219254  | 9.351574715  |
| 4.345401252  | 11.947447987 | 8.006698763  |
| 2.212443447  | 0.156820223  | 9.290864067  |
| 6.516329754  | 0.214915851  | 9.182904134  |
| 8.613974290  | 8.447787770  | 21.926100902 |
| 10.145471138 | 8.348303691  | 19.734177096 |
| 10.849706370 | 9.849930193  | 21.840842464 |
| 10.953493637 | 7.177657578  | 21.897593841 |
| 6.907304319  | 9.212903616  | 20.073365340 |
| 6.319893039  | 9.705893325  | 22.523179009 |

|              |              |              |
|--------------|--------------|--------------|
| 6.306982719  | 7.182594476  | 21.778283947 |
| 8.497276702  | 3.763558694  | 21.515906964 |
| 10.607451333 | 2.130046513  | 21.543622643 |
| 10.760095333 | 4.596516150  | 22.535584670 |
| 6.394063068  | 2.173966159  | 21.394749988 |
| 6.140543469  | 4.592592432  | 22.352924877 |
| 8.500820949  | 0.513494452  | 21.465227045 |
| 10.765664431 | 12.396898087 | 22.617413262 |
| 6.197246882  | 12.413984854 | 22.479361930 |
| 8.221354344  | 8.572712263  | 24.916768364 |
| 8.721938759  | 10.567202487 | 0.225949759  |
| 9.888027444  | 10.494424733 | 24.250533219 |
| 7.278154838  | 11.066647733 | 24.522411507 |
| 8.494492153  | 6.441779878  | 0.048040720  |
| 9.882078874  | 6.537087510  | 24.222024585 |
| 7.234108262  | 6.256354995  | 24.119873364 |
| 3.853929805  | 8.544993512  | 24.599488660 |
| 2.172827179  | 10.569100598 | 24.898555563 |
| 4.616767314  | 11.037663072 | 23.999770515 |
| 2.243453150  | 6.418491057  | 24.743874195 |
| 4.617146786  | 6.232686326  | 23.632075210 |
| 0.528429719  | 8.448167241  | 24.808017049 |
| 12.474232513 | 10.765158218 | 23.747689366 |

|              |             |              |
|--------------|-------------|--------------|
| 12.470182054 | 6.105356754 | 23.783059267 |
| 4.369702499  | 4.216046450 | 11.601305599 |
| 4.313505299  | 2.098530597 | 13.232578473 |
| 2.981229716  | 2.064103579 | 10.975456899 |
| 5.648185961  | 1.957911234 | 10.997365439 |
| 4.358311195  | 6.168262220 | 13.452985460 |
| 3.126405375  | 6.527467952 | 11.142543142 |
| 5.803487391  | 6.420896135 | 11.303295182 |
| 8.755985551  | 3.940377198 | 11.464310754 |
| 10.681874468 | 2.106251290 | 11.374827940 |
| 8.236922472  | 1.522383880 | 10.594034340 |
| 10.716554970 | 5.754251564 | 11.124593873 |
| 8.274513511  | 6.290655272 | 10.370196720 |
| 12.643456313 | 3.953540248 | 11.454807876 |
| 0.427173753  | 1.529471806 | 10.556816570 |
| 0.529948594  | 6.379760850 | 10.596674378 |
| 8.573218477  | 3.794315478 | 18.127452799 |
| 10.553279740 | 4.213641749 | 19.905486928 |
| 10.982352311 | 2.887694395 | 17.644406083 |
| 10.588719185 | 5.517059413 | 17.667106005 |
| 6.566704372  | 4.334136312 | 19.765852832 |
| 6.072448752  | 3.339929234 | 17.390476278 |
| 7.001346041  | 5.858671787 | 17.566801867 |

|              |              |              |
|--------------|--------------|--------------|
| 8.308940529  | 8.901034846  | 17.865604452 |
| 10.420254328 | 10.510119603 | 18.268671232 |
| 10.718453835 | 8.112250708  | 17.143409312 |
| 6.496331696  | 10.835404152 | 18.002600084 |
| 5.636415185  | 8.356277867  | 17.920771492 |
| 8.589546301  | 12.463094316 | 18.320935489 |
| 11.034625039 | 0.226307155  | 17.408426334 |
| 6.344700877  | 0.678162051  | 17.266943582 |
| 4.376284024  | 8.472848713  | 4.872965392  |
| 2.445332410  | 8.201862499  | 6.683203502  |
| 2.039802144  | 9.703489001  | 4.564924248  |
| 2.189407733  | 7.051720658  | 4.336070870  |
| 6.269011832  | 8.197432569  | 6.741801961  |
| 6.688971058  | 9.723739789  | 4.633817754  |
| 6.587968340  | 7.058176196  | 4.412883311  |
| 4.334136312  | 3.681794714  | 4.790346205  |
| 2.221683157  | 2.073216547  | 5.050610608  |
| 1.956772066  | 4.440708129  | 3.947521939  |
| 6.409631196  | 2.026005950  | 4.984884596  |
| 6.717449506  | 4.443366314  | 3.963887264  |
| 4.297430958  | 0.404517699  | 5.113960900  |
| 1.970441706  | 12.327411096 | 4.051522209  |
| 6.520506201  | 12.276657007 | 3.911359083  |



|              |              |              |
|--------------|--------------|--------------|
| 12.629280837 | 10.504044291 | 26.382801292 |
| 0.158465639  | 6.325841987  | 26.384385629 |
| 12.632065386 | 1.946266823  | 13.164740667 |
| 12.455246881 | 6.012074729  | 13.129634298 |
| 2.176624155  | 12.621433402 | 6.659182774  |
| 6.471776965  | 12.537644193 | 6.552542860  |
| 10.629094773 | 12.573337121 | 19.996025442 |
| 6.433299488  | 0.049615439  | 19.856391346 |
| 6.932618747  | 5.628314644  | 14.729231437 |
| 4.525130671  | 8.912805998  | 15.310208143 |
| 4.434885924  | 9.914101569  | 1.636288042  |
| 4.344768297  | 6.724537244  | 1.463658191  |
| 9.220877038  | 10.033582952 | 1.675618001  |
| 9.122279398  | 6.831362545  | 1.498500931  |
| 12.294503472 | 9.999409417  | 1.495333436  |
| 12.251975535 | 6.792758325  | 1.437526162  |
| 6.866295776  | 10.775916190 | 3.401124538  |
| 8.635744472  | 2.439636758  | 14.703891477 |
| 8.590558728  | 5.569332895  | 14.480053070 |
| 3.619015990  | 2.482290682  | 14.654267259 |
| 3.503963783  | 5.697928000  | 14.794165673 |
| 0.566653854  | 2.412170925  | 14.608074460 |
| 0.418693552  | 5.644388985  | 14.593028761 |

|              |              |              |
|--------------|--------------|--------------|
| 6.039287267  | 2.030435881  | 16.439692865 |
| 2.736823085  | 4.031254523  | 8.121521537  |
| 5.903098211  | 4.054290237  | 8.134191517  |
| 2.744037564  | 8.894326579  | 8.124160788  |
| 5.938664020  | 8.901414317  | 8.170881437  |
| 2.728595990  | 11.946056089 | 8.028079453  |
| 5.961953218  | 11.946815032 | 7.980302317  |
| 2.004489064  | 6.565312474  | 9.963434202  |
| 10.141041207 | 8.467533099  | 21.348557189 |
| 7.031089645  | 8.622960893  | 21.563419782 |
| 10.105981234 | 3.671542578  | 21.374161467 |
| 6.901355749  | 3.711411953  | 21.229774359 |
| 10.120663678 | 0.585639392  | 21.393694287 |
| 6.889457855  | 0.630824853  | 21.303947155 |
| 10.993490509 | 6.096749999  | 23.112865638 |
| 8.523223331  | 10.167241319 | 25.063002555 |
| 8.464368324  | 6.960590227  | 24.901194028 |
| 3.729131675  | 10.115094579 | 24.991996861 |
| 3.779633034  | 6.936541710  | 24.817255609 |
| 0.630191993  | 10.062947839 | 24.960849761 |
| 0.688034479  | 6.834906037  | 24.933134082 |
| 6.115862374  | 11.066647733 | 23.374978303 |
| 4.332364567  | 2.588609581  | 11.689996244 |

|              |              |              |
|--------------|--------------|--------------|
| 4.393497533  | 5.820447793  | 11.857083273 |
| 9.112153627  | 2.362682180  | 11.664920603 |
| 9.158604526  | 5.513389179  | 11.476980734 |
| 12.251469322 | 2.384199067  | 11.650666285 |
| 12.251469322 | 5.524400635  | 11.592859208 |
| 6.784025206  | 1.647182009  | 9.879758528  |
| 10.158634188 | 4.106057129  | 18.333605468 |
| 7.034127678  | 4.382106229  | 18.200569894 |
| 9.894356240  | 8.974445554  | 18.259168354 |
| 6.817819269  | 9.302261923  | 18.460042521 |
| 10.158001233 | 12.092876752 | 18.514153860 |
| 6.970842740  | 12.340448158 | 18.368712624 |
| 10.730098245 | 6.616953001  | 16.494597160 |
| 2.767452938  | 8.351974679  | 5.099179126  |
| 5.977141498  | 8.357417036  | 5.152499083  |
| 2.739227785  | 3.608257264  | 5.088357015  |
| 5.928538626  | 3.575982217  | 5.079118455  |
| 2.681258840  | 0.530201701  | 5.220600814  |
| 5.918792704  | 0.484509932  | 5.142732673  |
| 1.907283321  | 5.893731760  | 3.231134332  |
| 1.985503432  | 10.844770226 | 3.403236333  |
| 6.808199711  | 5.913476712  | 3.280230897  |
| 11.006653558 | 1.633006156  | 16.611531334 |

|              |              |              |
|--------------|--------------|--------------|
| 1.887664923  | 1.635790705  | 9.858905689  |
| 6.727701265  | 6.548984649  | 9.957890594  |
| 10.983111254 | 10.868185789 | 23.113129957 |
| 6.089156048  | 6.084219528  | 22.972702905 |
| 5.968281637  | 7.122979773  | 16.400889970 |
| 7.972391041  | 8.375263500  | 15.578919330 |
| 6.429629254  | 5.919552023  | 13.937616513 |
| 5.324040202  | 9.420098679  | 15.049942561 |
| 4.166051304  | 9.374912935  | 16.092057444 |

GVL-2@open Sn site

CONTCAR

1.0

|               |               |               |
|---------------|---------------|---------------|
| 12.6569995880 | 0.0000000000  | 0.0000000000  |
| 0.0000000000  | 12.6569995880 | 0.0000000000  |
| 0.0000000000  | 0.0000000000  | 26.3959999084 |

O Si Sn H C

133 63 1 18 10

Cartesian

|             |              |              |
|-------------|--------------|--------------|
| 4.317555758 | 8.364378032  | 1.775394878  |
| 4.461212778 | 10.458605063 | 0.142274441  |
| 3.348789095 | 10.727566425 | 2.485711224  |
| 5.973344522 | 10.396206564 | 2.262401060  |
| 4.534243638 | 6.504938073  | 26.285137192 |

|              |              |              |
|--------------|--------------|--------------|
| 3.106280763  | 6.044223411  | 2.082644444  |
| 5.768554159  | 6.150542498  | 2.182685247  |
| 9.049248160  | 8.445636175  | 1.783577737  |
| 10.855528952 | 10.412407647 | 1.949608477  |
| 8.473228185  | 10.774903764 | 2.931803700  |
| 10.771486259 | 6.425832278  | 1.580856389  |
| 8.381971766  | 6.044097046  | 2.647782693  |
| 12.578779478 | 8.408171124  | 1.623354039  |
| 0.690186168  | 10.722630282 | 2.635376638  |
| 0.500204613  | 6.047134702  | 2.619275042  |
| 9.294035017  | 3.972778987  | 14.675648734 |
| 8.826484969  | 1.851465970  | 13.149694968 |
| 9.758420291  | 1.572758780  | 15.626432147 |
| 7.223476278  | 2.268767200  | 15.194065351 |
| 9.113166053  | 6.090168475  | 13.017451563 |
| 9.545149915  | 6.459626342  | 15.556746472 |
| 6.354699906  | 7.689506932  | 15.579975030 |
| 3.551174380  | 4.213768491  | 14.797070029 |
| 2.145994301  | 2.032587475  | 14.828744192 |
| 4.614742085  | 1.984364452  | 15.827833378 |
| 1.880450443  | 6.277745328  | 14.445738869 |
| 3.773937571  | 6.387228059  | 16.227204419 |
| 0.402745717  | 4.129725798  | 14.862267011 |

|              |              |              |
|--------------|--------------|--------------|
| 12.437400417 | 1.784763528  | 15.839976294 |
| 12.226661862 | 6.528480378  | 15.741254920 |
| 4.362741125  | 3.775329846  | 8.386801303  |
| 2.473430821  | 4.319960459  | 6.585802147  |
| 1.931711310  | 2.785172849  | 8.679268898  |
| 2.318509240  | 5.423777388  | 8.949035785  |
| 6.313817728  | 4.269965313  | 6.621700685  |
| 6.820097606  | 2.893643154  | 8.809137371  |
| 6.277745328  | 5.529083672  | 8.934517936  |
| 4.407926492  | 8.955839393  | 8.540954035  |
| 2.239655986  | 10.454175133 | 8.176688576  |
| 2.037270701  | 8.059597754  | 9.278457619  |
| 6.575437491  | 10.483539265 | 8.234496441  |
| 6.754787816  | 8.103517588  | 9.382986132  |
| 4.404382623  | 11.966813090 | 8.014617304  |
| 2.284208775  | 0.192766104  | 9.318051896  |
| 6.509748229  | 0.272125500  | 9.270011228  |
| 8.729026497  | 8.449053680  | 21.965959498 |
| 10.263814107 | 8.487657144  | 19.760045693 |
| 10.950709842 | 9.885623121  | 21.929796641 |
| 11.071330393 | 7.213223765  | 21.877796703 |
| 7.024128649  | 9.411997761  | 20.216961066 |
| 6.395454965  | 9.542238624  | 22.724051602 |

|              |              |              |
|--------------|--------------|--------------|
| 6.441527148  | 7.158292475  | 21.706486871 |
| 8.586888494  | 3.868485506  | 21.614628338 |
| 10.657573221 | 2.164220425  | 21.575562698 |
| 10.912738578 | 4.634613401  | 22.539280409 |
| 6.593916910  | 2.125869689  | 21.860110965 |
| 6.184209819  | 4.628411725  | 22.414427694 |
| 8.634732046  | 0.421604654  | 21.547318382 |
| 10.951974998 | 12.452209602 | 22.667037480 |
| 6.295211944  | 12.219573369 | 22.383016276 |
| 8.392350267  | 8.622454680  | 24.956889704 |
| 8.798639476  | 10.616564678 | 0.289036200  |
| 9.993080622  | 10.605426481 | 24.321538914 |
| 7.371436863  | 11.092341632 | 24.564910140 |
| 8.594102974  | 6.460638768  | 0.047248840  |
| 9.996751610  | 6.568855966  | 24.218066101 |
| 7.344983267  | 6.343814438  | 24.108259085 |
| 3.908987836  | 8.593849490  | 24.738331373 |
| 2.273070578  | 10.649979270 | 24.996219663 |
| 4.700809630  | 11.048801269 | 24.030917614 |
| 2.353948873  | 6.430514938  | 24.747834252 |
| 4.722706176  | 6.365711361  | 23.627588090 |
| 0.682845135  | 8.492973514  | 24.874006986 |
| 12.591436314 | 10.790092420 | 23.818695060 |

|              |             |              |
|--------------|-------------|--------------|
| 12.595486774 | 6.185348988 | 23.772765007 |
| 4.460832929  | 4.319960459 | 11.696595552 |
| 4.306290819  | 2.166625125 | 13.256071350 |
| 3.155010376  | 2.139412587 | 10.917913353 |
| 5.805385878  | 2.078152691 | 11.114563931 |
| 4.346160571  | 6.336726700 | 13.512639621 |
| 3.223358011  | 6.593031225 | 11.145974562 |
| 5.864114521  | 6.547466010 | 11.366381549 |
| 8.797753791  | 3.956324797 | 11.495985703 |
| 10.787814084 | 2.181940147 | 11.371396520 |
| 8.352733621  | 1.556937546 | 10.555232232 |
| 10.776295661 | 5.692232537 | 10.981527571 |
| 8.330583969  | 6.335714274 | 10.450440188 |
| 0.119735220  | 4.010243661 | 11.490178564 |
| 0.572096400  | 1.568835063 | 10.657385026 |
| 0.607409432  | 6.473422346 | 10.716512123 |
| 8.578914317  | 4.150863025 | 18.182357093 |
| 10.612261489 | 4.233386701 | 19.930826888 |
| 10.873881629 | 2.962370825 | 17.632791804 |
| 10.789586207 | 5.624897140 | 17.760284557 |
| 6.561388757  | 3.923669902 | 19.881731306 |
| 6.161427212  | 3.470422826 | 17.333989219 |
| 6.603536468  | 5.961320263 | 18.149361338 |



|              |              |              |
|--------------|--------------|--------------|
| 8.297042635  | 8.888884222  | 17.982274308 |
| 10.314948421 | 10.628335830 | 18.247554075 |
| 10.738198409 | 8.207304856  | 17.172182265 |
| 6.783518993  | 11.061458106 | 18.149097020 |
| 5.534905877  | 8.813575403  | 18.139067078 |
| 8.736114235  | 0.175046299  | 18.400388361 |
| 11.188281465 | 0.311109049  | 17.480223410 |
| 6.418744540  | 0.818528119  | 17.268790664 |
| 4.470325746  | 8.454749520  | 4.830204014  |
| 2.603924602  | 8.224897836  | 6.722005610  |
| 2.162828150  | 9.771077127  | 4.645432034  |
| 2.223075432  | 7.125384851  | 4.354811914  |
| 6.275973205  | 8.239580280  | 6.794330536  |
| 6.751497053  | 9.798795879  | 4.730955184  |
| 6.750104401  | 7.144875942  | 4.446670054  |
| 4.410711042  | 3.751408070  | 4.841554368  |
| 2.310155592  | 2.125616582  | 5.082285950  |
| 2.044611734  | 4.495766161  | 3.983684403  |
| 6.483927589  | 2.098783704  | 5.049290982  |
| 6.798454166  | 4.514245580  | 4.033044696  |
| 4.385776840  | 0.454386291  | 5.150387682  |
| 2.065875514  | 12.381710185 | 4.072638973  |
| 6.638723183  | 12.345257560 | 3.988171523  |

|              |              |              |
|--------------|--------------|--------------|
| 0.061513021  | 10.541508588 | 0.060974757  |
| 0.249089763  | 6.347738156  | 26.391777106 |
| 0.022909170  | 2.028157545  | 13.229938435 |
| 12.251722805 | 6.018782996  | 13.153390707 |
| 2.244845424  | 0.009619320  | 6.682411333  |
| 6.549744346  | 12.622066357 | 6.630147076  |
| 10.772119214 | 12.583209408 | 20.052512501 |
| 6.548605178  | 0.400467475  | 19.879619905 |
| 7.142724347  | 5.471114726  | 14.746652856 |
| 3.360686612  | 4.707264790  | 18.914053538 |
| 3.862030346  | 6.900596052  | 18.945993593 |
| 3.565350233  | 9.439590524  | 15.984888893 |
| 4.988250034  | 9.673365171  | 14.257534682 |
| 4.525889990  | 9.973462789  | 1.682217112  |
| 4.439315855  | 6.765926013  | 1.495597361  |
| 9.291123726  | 10.053201539 | 1.732633500  |
| 9.205308910  | 6.850600906  | 1.509323238  |
| 12.374242221 | 10.016749668 | 1.563698994  |
| 12.340068687 | 6.811617216  | 1.451252038  |
| 6.949072559  | 10.832999074 | 3.489023408  |
| 8.754087441  | 2.431789323  | 14.669312958 |
| 8.731430821  | 5.513389179  | 14.502490247 |
| 3.660024533  | 2.619365988  | 14.674328715 |

|              |              |              |
|--------------|--------------|--------------|
| 3.421566849  | 5.829813867  | 14.762227192 |
| 0.600574612  | 2.527096578  | 14.665617219 |
| 0.360977619  | 5.733620928  | 14.559770261 |
| 6.134341415  | 2.154221395  | 16.395347149 |
| 2.771629762  | 4.086565284  | 8.166658635  |
| 5.949422746  | 4.125548974  | 8.200709304  |
| 2.826181392  | 8.933943224  | 8.173521475  |
| 6.003467974  | 8.956978561  | 8.234232122  |
| 2.789602780  | 11.980483107 | 8.051308011  |
| 6.019669057  | 12.001747076 | 8.041277283  |
| 2.060686075  | 6.617585956  | 10.021505598 |
| 10.248372721 | 8.523856286  | 21.373632830 |
| 7.143357302  | 8.633085910  | 21.616475420 |
| 10.186479681 | 3.716094990  | 21.410322750 |
| 6.991220270  | 3.640279581  | 21.416129890 |
| 10.246347114 | 0.593739839  | 21.445165588 |
| 7.028305096  | 0.623990081  | 21.415602826 |
| 11.112719162 | 6.146618781  | 23.109434218 |
| 8.634605304  | 10.224197461 | 25.121336696 |
| 8.587647436  | 7.008307037  | 24.911225543 |
| 3.823679611  | 10.177873303 | 25.078310999 |
| 3.882281511  | 6.979196388  | 24.869782610 |
| 0.742079896  | 10.108892525 | 25.045581136 |

|              |              |              |
|--------------|--------------|--------------|
| 0.804352360  | 6.875409121  | 24.959529742 |
| 6.206359849  | 10.990705959 | 23.425922540 |
| 4.440455023  | 2.695687800  | 11.729062670 |
| 4.477034012  | 5.935373258  | 11.942342498 |
| 9.204043754  | 2.389641612  | 11.658585613 |
| 9.246318207  | 5.523641315  | 11.506279964 |
| 12.350447187 | 2.450521660  | 11.692899813 |
| 12.268682831 | 5.556802423  | 11.592067039 |
| 6.859208038  | 1.708315164  | 9.932022784  |
| 10.187872333 | 4.245284218  | 18.355514008 |
| 6.975145929  | 4.414634759  | 18.372935427 |
| 9.891192219  | 9.053425362  | 18.276062709 |
| 6.902368175  | 9.506545696  | 18.589646675 |
| 10.236855052 | 12.218181472 | 18.552692436 |
| 7.124371670  | 12.606371487 | 18.423615346 |
| 10.807558659 | 6.700868952  | 16.532869844 |
| 2.868708952  | 8.388426549  | 5.133230188  |
| 6.059412067  | 8.401969825  | 5.198164424  |
| 2.815929257  | 3.664960676  | 5.135605907  |
| 6.002202442  | 3.649139442  | 5.148539812  |
| 2.767832598  | 0.581842275  | 5.254123633  |
| 6.007391692  | 0.553237462  | 5.211362254  |
| 1.985250325  | 5.943980012  | 3.264657348  |

|              |              |              |
|--------------|--------------|--------------|
| 2.066381727  | 10.884386872 | 3.461835579  |
| 6.909962126  | 5.972205354  | 3.331967107  |
| 11.032473445 | 1.688823507  | 16.630799835 |
| 1.995122801  | 1.683127855  | 9.885565667  |
| 6.794657190  | 6.616699517  | 10.034439110 |
| 11.104365514 | 10.920459271 | 23.184398396 |
| 6.194968546  | 6.146365674  | 22.975342943 |
| 5.314167915  | 7.116650977  | 17.192506467 |
| 5.841585019  | 8.342607850  | 15.026186939 |
| 6.752003266  | 6.408112556  | 14.941455564 |
| 1.727427349  | 6.856549476  | 20.623459266 |
| 0.660442234  | 4.763335248  | 19.978339705 |
| 3.298160994  | 3.243356069  | 20.369000823 |
| 1.367968511  | 4.192504523  | 21.505612704 |
| 3.003126262  | 6.016378295  | 21.522769804 |
| 2.665184310  | 2.211431021  | 18.186579895 |
| 1.230766652  | 3.276264448  | 18.082051382 |
| 1.322783050  | 2.030309328  | 19.348531735 |
| 3.232977569  | 11.748986797 | 13.784255164 |
| 1.316454538  | 10.937419296 | 15.099304035 |
| 3.157288524  | 10.723769450 | 17.547004729 |
| 1.831847572  | 12.253241445 | 16.177315882 |
| 4.105550916  | 12.225016480 | 15.250552410 |

|             |              |              |
|-------------|--------------|--------------|
| 1.898296718 | 8.631567271  | 17.962741488 |
| 0.991549365 | 8.833446719  | 16.437844209 |
| 0.743219017 | 9.980423785  | 17.777970295 |
| 3.258291242 | 5.926387032  | 19.423760232 |
| 2.357998955 | 5.958155865  | 20.628473450 |
| 1.604781003 | 4.629677258  | 20.527377930 |
| 2.558739047 | 3.739257446  | 19.718604333 |
| 1.912852420 | 2.758086864  | 18.771250767 |
| 4.085173009 | 10.136611277 | 14.941719883 |
| 3.407517360 | 11.479771951 | 14.832968568 |
| 2.157132498 | 11.321432865 | 15.698229224 |
| 2.585445372 | 10.264699791 | 16.721602668 |
| 1.493779067 | 9.368584894  | 17.255329303 |

Fructose@open Sn site

CONTCAR

1.0

|               |               |               |
|---------------|---------------|---------------|
| 12.6569995880 | 0.0000000000  | 0.0000000000  |
| 0.0000000000  | 12.6569995880 | 0.0000000000  |
| 0.0000000000  | 0.0000000000  | 26.3959999084 |

O Si Sn H C

135 63 1 14 6

Cartesian

|              |              |              |
|--------------|--------------|--------------|
| 4.267180764  | 8.289575426  | 1.940633842  |
| 4.151116131  | 10.284571862 | 0.177117156  |
| 3.431059287  | 10.699087977 | 2.673386774  |
| 5.968534743  | 10.332541401 | 2.069182492  |
| 4.420203858  | 6.529492804  | 26.339512850 |
| 3.009454869  | 5.990558031  | 2.131741009  |
| 5.676537667  | 6.023339668  | 2.174766509  |
| 9.006467494  | 8.415132875  | 1.832938227  |
| 10.845403181 | 10.367474632 | 2.037771271  |
| 8.419056592  | 10.767689284 | 2.896961059  |
| 10.690354858 | 6.373305313  | 1.677729795  |
| 8.286284663  | 6.032452636  | 2.725651031  |
| 12.516759696 | 8.351341724  | 1.621242343  |
| 0.764862504  | 10.676685595 | 2.464066609  |
| 0.415655849  | 6.037641886  | 2.720635666  |
| 8.904198866  | 4.003409029  | 14.791262890 |
| 8.664096178  | 1.863616594  | 13.242608415 |
| 9.695514824  | 1.660978014  | 15.673416328 |
| 7.085261992  | 2.085493912  | 15.319973767 |
| 8.631694012  | 6.035110443  | 13.009532235 |
| 9.361496402  | 6.503798905  | 15.507122253 |
| 6.681250365  | 8.418803108  | 15.381476583 |
| 3.654455434  | 4.147319156  | 14.959141302 |

|              |              |              |
|--------------|--------------|--------------|
| 2.091316118  | 2.028537393  | 14.831912867 |
| 4.499436772  | 1.807799243  | 15.895407652 |
| 1.916269736  | 6.124722235  | 14.736358595 |
| 4.170607976  | 6.460638768  | 16.133763121 |
| 0.281491669  | 4.033659224  | 14.870187125 |
| 12.365002889 | 1.622121065  | 15.793254859 |
| 12.069714673 | 6.414567339  | 15.680279168 |
| 4.270724633  | 3.671035988  | 8.358029137  |
| 2.363314947  | 4.223767520  | 6.565741084  |
| 1.839948113  | 2.748087835  | 8.709888147  |
| 2.296359398  | 5.397577653  | 8.884365867  |
| 6.259519016  | 4.094918931  | 6.624339937  |
| 6.738206507  | 2.967180416  | 8.975695764  |
| 6.090042110  | 5.550347640  | 8.821015182  |
| 4.389194344  | 8.875467689  | 8.416892702  |
| 2.233833780  | 10.425950168 | 8.337440616  |
| 2.094353773  | 8.007451014  | 9.404366821  |
| 6.574805290  | 10.451390583 | 8.240567112  |
| 6.729979601  | 8.070609210  | 9.357909705  |
| 4.385017520  | 11.939094339 | 8.043125152  |
| 2.330280203  | 0.195170935  | 9.407798242  |
| 6.579235221  | 0.298578625  | 9.093157788  |
| 8.600178286  | 8.326913735  | 22.024822276 |



|              |              |              |
|--------------|--------------|--------------|
| 10.065605646 | 8.234011181  | 19.791984174 |
| 10.772119214 | 9.822211441  | 21.821309644 |
| 10.979820491 | 7.158419217  | 21.986283700 |
| 6.913506373  | 9.199739811  | 20.207985252 |
| 6.334954577  | 9.610839176  | 22.684194581 |
| 6.272302594  | 7.118549842  | 21.849816705 |
| 8.516008851  | 3.706475810  | 21.574242679 |
| 10.636562736 | 2.101947913  | 21.528841262 |
| 10.782624457 | 4.557279352  | 22.556966146 |
| 6.418111586  | 2.090556609  | 21.572922660 |
| 6.175096852  | 4.537660765  | 22.460356174 |
| 8.538664717  | 0.459069376  | 21.566324138 |
| 10.870084654 | 12.371204188 | 22.586528908 |
| 6.247115286  | 12.312982136 | 22.594711767 |
| 8.319319029  | 8.540690323  | 25.002819758 |
| 8.880403832  | 10.553659212 | 0.272406728  |
| 9.805124674  | 10.557582929 | 24.196684625 |
| 7.218919605  | 10.982225569 | 24.709822739 |
| 8.511959146  | 6.409377712  | 0.128548515  |
| 9.881066448  | 6.444691169  | 24.283000337 |
| 7.226387569  | 6.260151971  | 24.209354605 |
| 3.814186794  | 8.494238669  | 24.642777102 |
| 2.110048455  | 10.513156882 | 24.898818308 |

|              |              |              |
|--------------|--------------|--------------|
| 4.591959477  | 10.983997692 | 24.094004768 |
| 2.239149773  | 6.340270946  | 24.829925588 |
| 4.615121933  | 6.164465245  | 23.727627909 |
| 0.514127313  | 8.360201585  | 24.898555563 |
| 12.424490851 | 10.621754305 | 23.743993627 |
| 12.472080919 | 6.023845881  | 23.861983502 |
| 4.578416579  | 4.200351957  | 11.671519124 |
| 4.279584871  | 2.133716935  | 13.316781211 |
| 2.931740783  | 2.22822325   | 11.054381134 |
| 5.563763796  | 1.795015664  | 11.052533265 |
| 4.373373110  | 6.170160708  | 13.496538221 |
| 2.990975638  | 6.320146146  | 11.262645205 |
| 5.674512437  | 6.552275412  | 11.263700905 |
| 8.895971960  | 3.885066060  | 11.537691381 |
| 10.663015578 | 1.904498772  | 11.475660715 |
| 8.191990212  | 1.520738499  | 10.664247866 |
| 10.624158629 | 5.903604424  | 11.235721695 |
| 8.159081833  | 6.156744175  | 10.403191689 |
| 12.420186908 | 3.939238030  | 11.438706476 |
| 0.428186274  | 1.523016741  | 10.605912938 |
| 0.447424918  | 6.339511249  | 10.559191503 |
| 8.566763694  | 3.672808111  | 18.202154232 |
| 10.542268285 | 4.218704635  | 19.928979805 |

|              |              |              |
|--------------|--------------|--------------|
| 10.984123680 | 2.772262529  | 17.737847381 |
| 10.556317019 | 5.393780300  | 17.602700406 |
| 6.542909338  | 4.175417755  | 19.864045569 |
| 6.049159932  | 3.283605292  | 17.443796235 |
| 7.022356526  | 5.758934979  | 17.736000298 |
| 8.227049430  | 8.830282699  | 17.936874465 |
| 10.345324980 | 10.426962594 | 18.351818269 |
| 10.639726757 | 8.032891429  | 17.214150688 |
| 6.426971447  | 10.771233530 | 18.128772818 |
| 5.591736032  | 8.251097948  | 18.119005621 |
| 8.538538729  | 12.392974370 | 18.331758386 |
| 10.977668897 | 0.117710097  | 17.381766355 |
| 6.248001347  | 0.618927289  | 17.400243474 |
| 4.343376022  | 8.453483610  | 5.014975995  |
| 2.379009628  | 8.228821554  | 6.795121918  |
| 1.972593300  | 9.587677097  | 4.578386003  |
| 2.212949849  | 6.940718911  | 4.497614292  |
| 6.351915357  | 8.252870071  | 6.758695530  |
| 6.631381961  | 9.698045890  | 4.573371032  |
| 6.533163792  | 7.027798882  | 4.469106837  |
| 4.317808865  | 3.652683688  | 4.858447937  |
| 2.213329509  | 2.011956650  | 5.100763070  |
| 1.949937434  | 4.362108170  | 3.957816199  |

|              |              |              |
|--------------|--------------|--------------|
| 6.373179325  | 1.978668800  | 4.989899960  |
| 6.713146318  | 4.415773927  | 4.038323985  |
| 4.270724633  | 0.334271364  | 5.144844467  |
| 1.912346018  | 12.232483690 | 4.178750643  |
| 6.476460379  | 12.255519781 | 3.866221985  |
| 12.543213291 | 10.452783235 | 26.383594247 |
| 0.153529401  | 6.234458449  | 0.076284437  |
| 0.011011590  | 1.974238870  | 13.200375674 |
| 12.475244939 | 5.994861220  | 13.126466410 |
| 2.182699655  | 12.601435343 | 6.768990577  |
| 6.477599548  | 12.460942722 | 6.509517557  |
| 10.596820103 | 12.559920587 | 19.977812641 |
| 6.458233690  | 12.656366633 | 19.974908285 |
| 6.843765898  | 5.688308819  | 14.899749887 |
| 5.209747693  | 10.767689284 | 10.964370470 |
| 5.463394033  | 10.851478493 | 14.617313020 |
| 3.270062394  | 11.966433619 | 12.877816680 |
| 2.815929257  | 8.912046301  | 14.744277136 |
| 1.148116423  | 10.367348645 | 16.185498741 |
| 8.109213429  | 10.808445098 | 11.242584535 |
| 4.449188519  | 9.890559264  | 1.707821194  |
| 4.347046633  | 6.708209420  | 1.551028916  |
| 9.286187582  | 10.015737242 | 1.748734900  |

|              |              |              |
|--------------|--------------|--------------|
| 9.129746607  | 6.813262597  | 1.580592464  |
| 12.327411096 | 9.959286559  | 1.523841087  |
| 12.258810543 | 6.751749782  | 1.515394401  |
| 6.864650395  | 10.761740714 | 3.363114206  |
| 8.575496813  | 2.391160440  | 14.772257134 |
| 8.482721001  | 5.545917332  | 14.543931606 |
| 3.622939707  | 2.550005739  | 14.756155734 |
| 3.496749303  | 5.761339679  | 14.849334286 |
| 0.528556320  | 2.435080086  | 14.667728620 |
| 0.370090657  | 5.640212161  | 14.614672982 |
| 5.993215839  | 1.944494889  | 16.525215622 |
| 2.686448090  | 4.016698821  | 8.139206487  |
| 5.844875782  | 4.073402234  | 8.191734276  |
| 2.779603751  | 8.892048243  | 8.228424983  |
| 5.994101900  | 8.929133823  | 8.194902164  |
| 2.772389271  | 11.949346852 | 8.134455048  |
| 5.998405089  | 11.951118975 | 7.977927384  |
| 1.961455291  | 6.511266869  | 10.013322739 |
| 10.108639042 | 8.395514287  | 21.403197165 |
| 7.020711144  | 8.553600644  | 21.678506873 |
| 10.122688530 | 3.640785794  | 21.395541370 |
| 6.913506373  | 3.623319178  | 21.349877208 |
| 10.152179405 | 0.555009444  | 21.400821446 |

|              |              |              |
|--------------|--------------|--------------|
| 6.923251918  | 0.552984309  | 21.428799870 |
| 11.004627951 | 6.042831136  | 23.173048435 |
| 8.552081250  | 10.146104093 | 25.134799631 |
| 8.489302526  | 6.921860021  | 24.978798244 |
| 3.661290443  | 10.059783064 | 25.046899582 |
| 3.764824603  | 6.888698913  | 24.892748424 |
| 0.577792052  | 9.980171056  | 24.985661084 |
| 0.681959120  | 6.748838491  | 25.020503922 |
| 6.109280471  | 10.985516332 | 23.511180979 |
| 4.340464731  | 2.588356475  | 11.757570518 |
| 4.382486077  | 5.801462161  | 11.900636821 |
| 9.114685447  | 2.286360369  | 11.740149099 |
| 9.090763671  | 5.488328235  | 11.537427849 |
| 12.205144409 | 2.343063782  | 11.690788412 |
| 12.162617227 | 5.535918303  | 11.600777748 |
| 6.752888951  | 1.654016641  | 9.942581363  |
| 10.154963954 | 4.021761707  | 18.362905485 |
| 7.032102071  | 4.250093997  | 18.311696929 |
| 9.821325757  | 8.893947108  | 18.328326966 |
| 6.759976689  | 9.249228744  | 18.596773834 |
| 10.110031693 | 12.022757560 | 18.522865356 |
| 6.923884873  | 12.275897311 | 18.465849660 |
| 10.674534001 | 6.572652941  | 16.503307082 |

|              |              |              |
|--------------|--------------|--------------|
| 2.735050961  | 8.297169377  | 5.209514385  |
| 5.959421775  | 8.354252261  | 5.189189790  |
| 2.718596961  | 3.551807335  | 5.124255553  |
| 5.913856560  | 3.530163895  | 5.132438413  |
| 2.659868507  | 0.468435544  | 5.300844675  |
| 5.892213120  | 0.432363098  | 5.127159123  |
| 1.907789535  | 5.854874811  | 3.324312098  |
| 2.018664917  | 10.780472862 | 3.470281970  |
| 6.795163404  | 5.883606366  | 3.347804581  |
| 10.994376193 | 1.559089234  | 16.649805592 |
| 1.894879403  | 1.666040899  | 9.933606335  |
| 6.658973970  | 6.568097023  | 9.956307043  |
| 10.957164625 | 10.833379300 | 23.092539863 |
| 6.087763774  | 6.034984078  | 23.065088502 |
| 5.977774453  | 7.014382349  | 16.627632734 |
| 7.597997030  | 8.629162947  | 15.649132069 |
| 6.266227283  | 5.935753106  | 14.138753425 |
| 6.039667116  | 11.954029512 | 12.475805601 |
| 5.124312725  | 9.189361311  | 13.396761147 |
| 3.158048032  | 10.014850803 | 12.319277150 |
| 5.840572593  | 10.110664648 | 15.143912496 |
| 3.828236283  | 12.520810155 | 13.457472581 |
| 1.139383115  | 11.517489731 | 14.448378907 |

|             |              |              |
|-------------|--------------|--------------|
| 4.477034012 | 11.414714890 | 10.974136880 |
| 1.497702784 | 9.446172049  | 16.174413099 |
| 2.478873367 | 11.848090650 | 15.555162134 |
| 7.685583215 | 10.206225010 | 13.134913587 |
| 7.030583432 | 9.123924779  | 11.874240374 |
| 7.700518388 | 10.788699769 | 10.356734572 |
| 5.861203229 | 10.887931118 | 12.241672934 |
| 5.014829994 | 10.287356411 | 13.380397002 |
| 3.519025698 | 10.591124263 | 13.189289245 |
| 2.732139859 | 10.088640983 | 14.390834575 |
| 1.839188605 | 11.032473445 | 15.156055412 |
| 7.206642240 | 10.183188918 | 12.145063748 |

Fructose-2@open Sn site

CONTCAR

1.0

|               |               |               |
|---------------|---------------|---------------|
| 12.6569995880 | 0.0000000000  | 0.0000000000  |
| 0.0000000000  | 12.6569995880 | 0.0000000000  |
| 0.0000000000  | 0.0000000000  | 26.3959999084 |

O Si Sn H C

135 63 1 14 6

Cartesian

|             |             |             |
|-------------|-------------|-------------|
| 4.052897962 | 8.230340193 | 2.037243224 |
|-------------|-------------|-------------|



|              |              |              |
|--------------|--------------|--------------|
| 4.323124857  | 10.201162124 | 0.261848322  |
| 3.167920508  | 10.668458689 | 2.563843487  |
| 5.780831525  | 10.221919125 | 2.433447164  |
| 4.370082347  | 6.476839851  | 0.060974757  |
| 2.963889653  | 5.836648876  | 2.226238597  |
| 5.614391897  | 6.077764745  | 2.341853146  |
| 8.911793572  | 8.341468682  | 1.976796502  |
| 10.686178411 | 10.343426869 | 2.055192493  |
| 8.296156950  | 10.695038272 | 3.031052727  |
| 10.610235882 | 6.302932637  | 1.776978626  |
| 8.221987299  | 5.945372287  | 2.840737532  |
| 12.383608296 | 8.310712652  | 1.778298448  |
| 0.509697382  | 10.614413084 | 2.786097753  |
| 0.354269423  | 5.965876936  | 2.790585070  |
| 8.932424585  | 3.973285200  | 14.909779828 |
| 8.648401308  | 1.903486157  | 13.284578412 |
| 9.702602562  | 1.596680462  | 15.716970661 |
| 7.092096246  | 2.070938211  | 15.392563798 |
| 8.866228356  | 6.005493204  | 13.103502170 |
| 9.448450386  | 6.456462321  | 15.643589248 |
| 6.507849364  | 8.310839394  | 15.196705389 |
| 3.576614795  | 4.058846532  | 15.034105480 |
| 2.086885998  | 1.879817488  | 14.919282706 |

|              |              |              |
|--------------|--------------|--------------|
| 4.511334289  | 1.752741211  | 15.986208912 |
| 1.876147066  | 6.084219528  | 14.792582909 |
| 4.134788684  | 6.377735243  | 16.195001619 |
| 0.400594028  | 3.951262289  | 15.308096742 |
| 12.364369934 | 1.487450554  | 15.929194789 |
| 12.126924299 | 6.369887808  | 15.927081815 |
| 4.248954829  | 3.701159817  | 8.565238294  |
| 2.329900544  | 4.160862054  | 6.771894147  |
| 1.864882315  | 2.616708181  | 8.888060819  |
| 2.131185681  | 5.255945486  | 9.140407074  |
| 6.157756978  | 4.136054216  | 6.727812749  |
| 6.700362739  | 2.773528250  | 8.918416536  |
| 6.222560555  | 5.413651994  | 9.021360712  |
| 4.238196480  | 8.794589771  | 8.633867482  |
| 2.081949855  | 10.310139019 | 8.293359219  |
| 1.849440741  | 7.914421718  | 9.376123292  |
| 6.391278518  | 10.364057883 | 8.460181930  |
| 6.542909338  | 7.980364463  | 9.608935940  |
| 4.237816631  | 11.874290762 | 8.230272852  |
| 2.060686075  | 12.652949129 | 9.484611076  |
| 6.388493969  | 0.163022158  | 9.437889640  |
| 8.532589405  | 8.397792624  | 22.126183687 |
| 10.048898350 | 8.282993901  | 19.930564142 |

|              |              |              |
|--------------|--------------|--------------|
| 10.798698798 | 9.754369831  | 22.048050834 |
| 10.852997132 | 7.087286844  | 22.080782271 |
| 6.823641852  | 9.052792407  | 20.229102409 |
| 6.224712527  | 9.655139236  | 22.653047481 |
| 6.231294051  | 7.104879825  | 21.999482316 |
| 8.465001279  | 3.724322274  | 21.660556818 |
| 10.535306534 | 2.037776914  | 21.742121091 |
| 10.733514995 | 4.507157465  | 22.699240280 |
| 6.377609256  | 2.100555639  | 21.553916903 |
| 6.092826282  | 4.509815649  | 22.512620430 |
| 8.444243523  | 0.394898376  | 21.646831137 |
| 10.719845732 | 12.303363333 | 22.793737278 |
| 6.124089280  | 12.362471069 | 22.671260282 |
| 8.173257309  | 8.472975455  | 25.074352516 |
| 8.616758840  | 10.458479076 | 0.401219205  |
| 9.843728139  | 10.415571668 | 24.455630188 |
| 7.225881356  | 10.966530700 | 24.668117061 |
| 8.423865994  | 6.365711361  | 0.243107154  |
| 9.821705228  | 6.415073552  | 24.415771593 |
| 7.175886210  | 6.143960596  | 24.317050220 |
| 3.796213966  | 8.452850655  | 24.744929895 |
| 2.131185681  | 10.481008200 | 25.124768116 |
| 4.557152611  | 10.960834859 | 24.188766084 |

|              |              |              |
|--------------|--------------|--------------|
| 2.180041659  | 6.333815409  | 24.947386826 |
| 4.558544885  | 6.107381984  | 23.845617784 |
| 0.477675159  | 8.373364635  | 25.020768240 |
| 12.427275400 | 10.686051669 | 23.954633417 |
| 12.412972428 | 6.046881595  | 23.955953436 |
| 4.192124674  | 4.151622344  | 11.736453361 |
| 4.272749863  | 2.074229162  | 13.413391184 |
| 3.095648967  | 1.825645707  | 11.092918924 |
| 5.732481760  | 2.008412781  | 11.261853036 |
| 4.238702693  | 6.134214673  | 13.551442515 |
| 3.314615183  | 6.576450671  | 11.107964623 |
| 5.896769416  | 6.213068116  | 11.544026371 |
| 8.925716318  | 3.900634188  | 11.529772841 |
| 10.688203263 | 1.913991400  | 11.573062069 |
| 8.250971206  | 1.499601272  | 10.686684256 |
| 10.758702681 | 5.864114521  | 11.258421616 |
| 8.300713623  | 6.254329766  | 10.499273024 |
| 12.516506966 | 3.897722897  | 11.405711508 |
| 0.486788221  | 1.421254514  | 10.885182703 |
| 0.674618087  | 6.380267063  | 11.086848252 |
| 8.557903833  | 3.659012106  | 18.318295451 |
| 10.554292167 | 4.082768308  | 20.061488316 |
| 10.966403958 | 2.805297461  | 17.757908838 |

|              |              |              |
|--------------|--------------|--------------|
| 10.534294108 | 5.427068150  | 17.833401653 |
| 6.527214468  | 4.254523927  | 19.918685545 |
| 6.053336756  | 3.215004363  | 17.551756168 |
| 7.014635833  | 5.702990885  | 17.676344565 |
| 8.247933928  | 8.802310464  | 18.027411406 |
| 10.354691054 | 10.431139796 | 18.465321024 |
| 10.690102128 | 8.035549236  | 17.371734840 |
| 6.422794245  | 10.722377552 | 18.209808454 |
| 5.605278930  | 8.222999726  | 18.040082959 |
| 8.511578920  | 12.369558807 | 18.521545337 |
| 10.933495579 | 0.139226995  | 17.564426148 |
| 6.276099947  | 0.555135997  | 17.445116254 |
| 4.358817408  | 8.384123361  | 5.067504176  |
| 2.401159469  | 8.092252649  | 6.833132644  |
| 2.046383669  | 9.645392936  | 4.739401968  |
| 2.156752650  | 6.996409897  | 4.471482557  |
| 6.215472817  | 8.134527102  | 6.984645338  |
| 6.683528701  | 9.618433882  | 4.861087188  |
| 6.563286867  | 6.948819075  | 4.670771993  |
| 4.233892914  | 3.601169526  | 4.986996390  |
| 2.127388517  | 1.994110375  | 5.245941167  |
| 1.854250520  | 4.379195315  | 4.175847073  |
| 6.313690986  | 1.944747995  | 5.195788705  |

|              |              |              |
|--------------|--------------|--------------|
| 6.611890116  | 4.350716866  | 4.129918200  |
| 4.209591667  | 0.321614363  | 5.324601083  |
| 1.893866788  | 12.256784937 | 4.228639180  |
| 6.441527148  | 12.171856559 | 4.159217823  |
| 12.585487744 | 10.438100792 | 0.198761881  |
| 0.075941998  | 6.239394593  | 0.169462319  |
| 12.582070240 | 2.180294766  | 13.397289784 |
| 12.284757172 | 5.650464297  | 13.414182566 |
| 2.080937240  | 12.541947381 | 6.846858325  |
| 6.371026976  | 12.476257366 | 6.799081975  |
| 10.577328258 | 12.510431654 | 20.162848154 |
| 6.358623623  | 12.613712709 | 20.043011196 |
| 6.946540739  | 5.747290191  | 14.832439931 |
| 0.304021123  | 11.774300470 | 13.063380043 |
| 2.095239646  | 9.169869466  | 14.893415683 |
| 3.092231652  | 9.846006475  | 12.341185689 |
| 4.620564290  | 10.281154358 | 15.163182570 |
| 6.879079355  | 11.191318744 | 13.815930900 |
| 10.798446068 | 10.392789060 | 14.347810451 |
| 4.333883206  | 9.822211441  | 1.828450910  |
| 4.257561583  | 6.653404872  | 1.667963189  |
| 9.127975238  | 9.948908058  | 1.853527141  |
| 9.049248160  | 6.745420987  | 1.696470840  |

|              |              |              |
|--------------|--------------|--------------|
| 12.204891680 | 9.920935823  | 1.691983522  |
| 12.172489514 | 6.709095858  | 1.619394572  |
| 6.788075666  | 10.677824763 | 3.625490402  |
| 8.583344248  | 2.368124537  | 14.840095726 |
| 8.608151708  | 5.532754283  | 14.628927299 |
| 3.603447862  | 2.457229927  | 14.850652732 |
| 3.447387112  | 5.672234478  | 14.923769827 |
| 0.540580437  | 2.383692665  | 14.878897048 |
| 0.355281967  | 5.519970704  | 14.868338469 |
| 6.009796393  | 1.898676567  | 16.604404175 |
| 2.645566100  | 3.943035006  | 8.347471345  |
| 5.833737585  | 4.009231235  | 8.310252788  |
| 2.653919748  | 8.790033098  | 8.278841370  |
| 5.844875782  | 8.828004363  | 8.411085562  |
| 2.621391218  | 11.837585407 | 8.204405042  |
| 5.854874811  | 11.884289791 | 8.225785731  |
| 1.992211699  | 6.508861791  | 10.161931863 |
| 10.058391166 | 8.392983222  | 21.541511242 |
| 6.950338469  | 8.539803885  | 21.741856772 |
| 10.073705810 | 3.585221549  | 21.537288440 |
| 6.868067899  | 3.640912536  | 21.389998548 |
| 10.063960265 | 0.490964998  | 21.573451297 |
| 6.835032778  | 0.544883814  | 21.479745681 |

|              |              |              |
|--------------|--------------|--------------|
| 10.932736636 | 6.007265327  | 23.291829692 |
| 8.461077561  | 10.069656105 | 25.229825266 |
| 8.406525743  | 6.859334026  | 25.087286814 |
| 3.687363813  | 10.016496185 | 25.175449609 |
| 3.718626433  | 6.849461738  | 25.007306878 |
| 0.582728242  | 9.987765007  | 25.172280934 |
| 0.624116634  | 6.757698352  | 25.123185352 |
| 6.046628489  | 10.995768090 | 23.538896658 |
| 4.325529558  | 2.532412570  | 11.862890413 |
| 4.395522762  | 5.748556101  | 11.983520326 |
| 9.131898956  | 2.304966153  | 11.785814047 |
| 9.218219230  | 5.495922186  | 11.596290628 |
| 12.224762997 | 2.351797090  | 11.836493966 |
| 12.230458837 | 5.448838332  | 11.805611186 |
| 6.757698352  | 1.611615823  | 10.061099088 |
| 10.145344396 | 4.001130693  | 18.489869601 |
| 7.022735997  | 4.243005882  | 18.363432548 |
| 9.821957957  | 8.898883251  | 18.443412484 |
| 6.756939410  | 9.184171684  | 18.617890991 |
| 10.082186200 | 12.010732924 | 18.692328105 |
| 6.895026954  | 12.225522693 | 18.557443875 |
| 10.704783818 | 6.563286867  | 16.693094034 |
| 2.745176733  | 8.274640253  | 5.258611147  |



|              |              |              |
|--------------|--------------|--------------|
| 5.952207296  | 8.264387740  | 5.385576049  |
| 2.641895490  | 3.529784047  | 5.299788974  |
| 5.830699929  | 3.497382258  | 5.262042567  |
| 2.592026897  | 0.451854896  | 5.410652084  |
| 5.830826671  | 0.400973735  | 5.371322125  |
| 1.841973154  | 5.808423534  | 3.410099173  |
| 1.905384645  | 10.775789448 | 3.574546165  |
| 6.740232114  | 5.840825700  | 3.491398734  |
| 10.965645015 | 1.530610975  | 16.747734010 |
| 1.883867759  | 1.493399407  | 10.070601966 |
| 6.731245511  | 6.463550059  | 10.152429771 |
| 10.936913083 | 10.781612031 | 23.311099767 |
| 6.028022705  | 5.985115297  | 23.171201353 |
| 5.983596658  | 6.970083043  | 16.563225561 |
| 5.966130042  | 9.122912353  | 15.380156564 |
| 6.569615663  | 6.259392651  | 14.081210666 |
| 0.412365039  | 9.682604504  | 13.113796430 |
| 1.994490035  | 11.247263214 | 15.227323851 |
| 2.877189153  | 11.803031647 | 12.925857348 |
| 2.888707010  | 9.179995237  | 15.467792295 |
| 2.931614230  | 8.982419731  | 12.781471026 |
| 5.426435572  | 12.401581501 | 13.086872919 |
| 0.531593976  | 11.637098610 | 12.126850160 |

|              |              |              |
|--------------|--------------|--------------|
| 12.278555118 | 9.574766777  | 15.484949395 |
| 12.230079366 | 11.359023904 | 15.538269352 |
| 10.670863013 | 11.175624628 | 13.779503724 |
| 7.078806455  | 10.249511889 | 13.987505050 |
| 5.533260496  | 10.861224793 | 12.221612263 |
| 0.526784338  | 10.551001404 | 13.786895202 |
| 1.936520901  | 10.508980435 | 14.404033192 |
| 3.052741748  | 10.822367844 | 13.397818421 |
| 4.447290031  | 10.792623486 | 14.052702032 |
| 5.604772717  | 11.320166955 | 13.229147053 |
| 12.120848987 | 10.476705011 | 14.878632729 |

Glu-2@open Sn site

CONTCAR

1.0

|               |               |               |
|---------------|---------------|---------------|
| 12.6569995880 | 0.0000000000  | 0.0000000000  |
| 0.0000000000  | 12.6569995880 | 0.0000000000  |
| 0.0000000000  | 0.0000000000  | 26.3959999084 |

O Si Sn C H

135 63 1 6 14

Cartesian

|             |              |             |
|-------------|--------------|-------------|
| 4.237436783 | 8.090986739  | 1.821060023 |
| 4.461845356 | 10.136864760 | 0.127228717 |

|              |              |              |
|--------------|--------------|--------------|
| 3.300818801  | 10.486071085 | 2.440310201  |
| 5.924614909  | 10.096488418 | 2.293284431  |
| 4.513485883  | 6.268632361  | 26.298598554 |
| 3.114634411  | 5.726406448  | 2.096898171  |
| 5.770579389  | 5.925500970  | 2.182421321  |
| 9.057601808  | 8.199330679  | 1.813933061  |
| 10.829582324 | 10.199263259 | 1.889689604  |
| 8.447535040  | 10.543913666 | 2.885346780  |
| 10.765410948 | 6.167629265  | 1.624409838  |
| 8.379060475  | 5.811081719  | 2.697407305  |
| 12.543846246 | 8.173763522  | 1.647110350  |
| 0.640823883  | 10.489868061 | 2.648574665  |
| 0.502989163  | 5.821840068  | 2.649102515  |
| 9.194424196  | 3.780012883  | 14.751404295 |
| 8.838003392  | 1.657054296  | 13.199847037 |
| 9.874484923  | 1.409610009  | 15.634350688 |
| 7.272205514  | 1.956772066  | 15.277476707 |
| 9.079498732  | 5.870569681  | 13.018242945 |
| 9.560085088  | 6.252684384  | 15.559650828 |
| 7.000713086  | 7.894677143  | 14.976034084 |
| 3.586234353  | 3.934554993  | 15.125435376 |
| 2.241048260  | 1.722997419  | 14.714978693 |
| 4.672331559  | 1.609970442  | 15.814107697 |

|              |              |              |
|--------------|--------------|--------------|
| 2.000059134  | 6.020175270  | 14.697292955 |
| 4.276293732  | 6.325588503  | 16.034250366 |
| 0.510203642  | 3.802415642  | 14.805779952 |
| 12.552073152 | 1.441885433  | 15.839711975 |
| 12.235268239 | 6.140037256  | 15.767650581 |
| 4.430329629  | 3.497635365  | 8.344831307  |
| 2.453432763  | 4.008851386  | 6.626715656  |
| 2.026891823  | 2.537348714  | 8.799898811  |
| 2.427232839  | 5.181142880  | 8.948243617  |
| 6.387102072  | 3.981005893  | 6.592928912  |
| 6.877560715  | 2.624302321  | 8.808345202  |
| 6.356598017  | 5.253667527  | 8.895187978  |
| 4.385397368  | 8.680043777  | 8.567085376  |
| 2.232314953  | 10.196605452 | 8.158739307  |
| 1.986769153  | 7.810128237  | 9.242559081  |
| 6.550123817  | 10.216097297 | 8.266171390  |
| 6.726688839  | 7.829999554  | 9.411493980  |
| 4.395649504  | 11.725697221 | 8.046820891  |
| 2.253072519  | 12.562578395 | 9.327554774  |
| 6.533922735  | 0.003543960  | 9.276874068  |
| 8.705104721  | 8.249706051  | 21.959096657 |
| 10.263434636 | 8.149715759  | 19.777731430 |
| 10.979693749 | 9.585904974  | 21.921086718 |

|              |              |              |
|--------------|--------------|--------------|
| 11.003742267 | 6.910595081  | 21.922405164 |
| 6.978942905  | 8.937487471  | 20.097122535 |
| 6.374318493  | 9.446298791  | 22.540864746 |
| 6.424693110  | 6.921733279  | 21.819725307 |
| 8.589292818  | 3.532821702  | 21.567906902 |
| 10.686051669 | 1.875261004  | 21.611988300 |
| 10.858819715 | 4.343249280  | 22.594711767 |
| 6.486205925  | 1.935761581  | 21.433024245 |
| 6.217877518  | 4.346286936  | 22.391726199 |
| 8.581065911  | 0.263012462  | 21.502709921 |
| 10.835024681 | 12.139581136 | 22.667037480 |
| 6.258759696  | 12.157681083 | 22.465636250 |
| 8.296410434  | 8.325774567  | 24.936036866 |
| 8.745733793  | 10.321529946 | 0.251817839  |
| 10.004092832 | 10.234323232 | 24.324706015 |
| 7.390928708  | 10.829961795 | 24.493375809 |
| 8.573724690  | 6.212814632  | 0.096345402  |
| 9.965994825  | 6.289769210  | 24.270066039 |
| 7.318783155  | 5.995114326  | 24.171608984 |
| 3.957463966  | 8.315015841  | 24.669174335 |
| 2.283322713  | 10.344566037 | 24.966392583 |
| 4.713340102  | 10.803508199 | 24.033030589 |
| 2.327495654  | 6.202056284  | 24.782148452 |

|              |              |              |
|--------------|--------------|--------------|
| 4.705239561  | 6.007771540  | 23.671669487 |
| 0.621332132  | 8.237301943  | 24.862919770 |
| 12.580045388 | 10.563152028 | 23.818957805 |
| 12.554857702 | 5.900566768  | 23.818166423 |
| 4.309328475  | 4.039228322  | 11.400168686 |
| 4.448176093  | 2.178522831  | 13.291178507 |
| 3.116912747  | 1.696797307  | 11.077873224 |
| 5.775515533  | 1.815013723  | 11.080512476 |
| 4.367044691  | 5.796399653  | 13.427116864 |
| 3.270821714  | 6.457474747  | 11.111396043 |
| 5.918412855  | 6.159781831  | 11.359254391 |
| 8.826991182  | 3.723436212  | 11.508392151 |
| 10.780979076 | 1.924117171  | 11.399904368 |
| 8.336912764  | 1.305063234  | 10.615942880 |
| 10.835783623 | 5.474025640  | 11.097142513 |
| 8.386781168  | 6.096876741  | 10.436450189 |
| 0.128595117  | 3.721031134  | 11.558280688 |
| 0.532226836  | 1.298608168  | 10.636795719 |
| 0.662467369  | 6.159022511  | 10.702786442 |
| 8.689030380  | 3.545858388  | 18.170478496 |
| 10.659598828 | 3.940377198  | 19.962238305 |
| 11.103605817 | 2.673537958  | 17.664203222 |
| 10.700227145 | 5.296195086  | 17.758964538 |

|              |              |              |
|--------------|--------------|--------------|
| 6.674542098  | 4.093020444  | 19.802015689 |
| 6.186235049  | 3.040337829  | 17.448283356 |
| 7.084375553  | 5.556802423  | 17.554660525 |
| 8.420448489  | 8.618783692  | 17.907310130 |
| 10.494930946 | 10.292165813 | 18.281605530 |
| 10.854516526 | 7.885311069  | 17.198842244 |
| 6.651886232  | 10.581631447 | 18.056447104 |
| 5.775641897  | 8.089468100  | 17.913908652 |
| 8.700927520  | 12.283744745 | 18.331494067 |
| 11.169169091 | 0.006201930  | 17.464122010 |
| 6.427224176  | 0.380342840  | 17.247146443 |
| 4.484248492  | 8.265147437  | 4.843137919  |
| 2.609493512  | 7.974922106  | 6.703792022  |
| 2.147639682  | 9.507305393  | 4.616396336  |
| 2.276108233  | 6.857182431  | 4.355604083  |
| 6.265341221  | 7.985174619  | 6.815446907  |
| 6.820857302  | 9.492749691  | 4.722244474  |
| 6.699982513  | 6.826805872  | 4.503949282  |
| 4.403750046  | 3.502698250  | 4.887747167  |
| 2.312054079  | 1.858680450  | 5.073839166  |
| 2.022588446  | 4.241234136  | 4.024862230  |
| 6.458740657  | 1.812102620  | 5.031077394  |
| 6.772507538  | 4.222375245  | 3.988171523  |

|              |              |              |
|--------------|--------------|--------------|
| 4.371094773  | 0.162769016  | 5.164905137  |
| 2.048408898  | 12.118570651 | 4.077653944  |
| 6.615180878  | 12.046299110 | 4.001633672  |
| 0.093408655  | 10.294317408 | 0.058071199  |
| 0.238711003  | 6.111432066  | 0.027715799  |
| 0.036452159  | 1.690215782  | 13.235218511 |
| 12.462841587 | 5.799563673  | 13.188233544 |
| 2.233580674  | 12.420186908 | 6.692442061  |
| 6.537340239  | 12.350193704 | 6.639385636  |
| 10.716175499 | 12.330195645 | 20.040898222 |
| 6.534555690  | 12.504862556 | 19.852166971 |
| 7.083616611  | 5.364796016  | 14.676175798 |
| 11.160182488 | 9.008872572  | 12.766953177 |
| 1.087362833  | 9.933972885  | 12.017043145 |
| 1.897917059  | 9.101521643  | 15.471223715 |
| 3.713943396  | 9.079625474  | 12.970994446 |
| 4.551963360  | 9.649443396  | 15.687406326 |
| 6.641507732  | 10.532775469 | 14.225596201 |
| 4.484248492  | 9.692603533  | 1.677729795  |
| 4.416786731  | 6.502659737  | 1.504571996  |
| 9.270746196  | 9.806516572  | 1.697790662  |
| 9.202398373  | 6.602903513  | 1.545485800  |
| 12.353864692 | 9.782342066  | 1.547861421  |



|              |              |              |
|--------------|--------------|--------------|
| 12.328677006 | 6.573285896  | 1.477384068  |
| 6.939959214  | 10.544672609 | 3.479784848  |
| 8.778009217  | 2.191686069  | 14.734775831 |
| 8.749277285  | 5.326065432  | 14.515424545 |
| 3.735080622  | 2.372934316  | 14.738207251 |
| 3.571425545  | 5.530096098  | 14.832439931 |
| 0.680693446  | 2.185990417  | 14.646348718 |
| 0.478308020  | 5.416183437  | 14.631567337 |
| 6.163452441  | 1.758690158  | 16.459490003 |
| 2.835041253  | 3.811908458  | 8.190150725  |
| 6.016251553  | 3.846968431  | 8.166394316  |
| 2.813271260  | 8.679158093  | 8.152932168  |
| 5.982457490  | 8.689283109  | 8.255349280  |
| 2.779477197  | 11.723672369 | 8.051835861  |
| 6.012327835  | 11.738228070 | 8.053683731  |
| 2.094480327  | 6.376976301  | 9.987454143  |
| 10.236348085 | 8.235783304  | 21.391318567 |
| 7.117916887  | 8.374883274  | 21.591399779 |
| 10.198757046 | 3.419288512  | 21.434344264 |
| 6.994384291  | 3.472068208  | 21.273328693 |
| 10.200781899 | 0.332246229  | 21.441471423 |
| 6.973121077  | 0.391354437  | 21.316881453 |
| 11.074621156 | 5.853988750  | 23.155362698 |

|              |              |              |
|--------------|--------------|--------------|
| 8.604608216  | 9.919923397  | 25.082006738 |
| 8.546005938  | 6.714538215  | 24.943428343 |
| 3.840260165  | 9.890179793  | 25.044525436 |
| 3.869244826  | 6.704539186  | 24.863712725 |
| 0.737143658  | 9.850436406  | 25.026311061 |
| 0.772962951  | 6.622268616  | 24.973519741 |
| 6.198639156  | 10.819962766 | 23.376561067 |
| 4.416153776  | 2.438750697  | 11.696595552 |
| 4.458554593  | 5.609202647  | 11.823560455 |
| 9.204423226  | 2.145994301  | 11.695012001 |
| 9.279479316  | 5.284297192  | 11.510240021 |
| 12.348295593 | 2.155360375  | 11.717448391 |
| 12.349687491 | 5.282904918  | 11.642219894 |
| 6.868826842  | 1.442897954  | 9.933342803  |
| 10.272167755 | 3.866966490  | 18.387981126 |
| 7.141078966  | 4.103019473  | 18.237259814 |
| 9.997764036  | 8.746492735  | 18.290844090 |
| 6.934770341  | 9.042539894  | 18.482215379 |
| 10.257359324 | 11.873531065 | 18.545565278 |
| 7.085261992  | 12.096800470 | 18.379535522 |
| 10.835404152 | 6.384696994  | 16.572992758 |
| 2.881619084  | 8.146298254  | 5.113433050  |
| 6.067765715  | 8.136551955  | 5.211362254  |

|              |              |              |
|--------------|--------------|--------------|
| 2.805803674  | 3.398531134  | 5.156458746  |
| 6.004227294  | 3.369799579  | 5.128478749  |
| 2.755935081  | 0.313640445  | 5.253067932  |
| 5.991064244  | 0.266682979  | 5.212154030  |
| 1.989933551  | 5.677423728  | 3.274951804  |
| 2.036511193  | 10.631247121 | 3.440454497  |
| 6.892875359  | 5.706787861  | 3.338566022  |
| 11.148918303 | 1.403154944  | 16.652444056 |
| 1.996261969  | 1.375436192  | 9.945220614  |
| 6.837058385  | 6.330651388  | 10.015170608 |
| 11.087911702 | 10.622387260 | 23.178855575 |
| 6.178387614  | 5.836901982  | 23.017575685 |
| 6.138518239  | 6.874269953  | 16.411448549 |
| 12.048830930 | 9.586664671  | 13.733310926 |
| 0.841437374  | 9.368584894  | 13.312558409 |
| 1.838808945  | 9.963083534  | 14.317719053 |
| 3.216523379  | 10.222805564 | 13.671279473 |
| 4.272243650  | 10.632006064 | 14.718937176 |
| 5.547436349  | 11.034245568 | 14.019707850 |
| 6.708842375  | 8.845470601  | 14.940399864 |
| 6.708462903  | 5.955877906  | 13.983809312 |
| 11.879733119 | 9.188981840  | 14.747972875 |
| 11.836825711 | 10.668838160 | 13.743869505 |

|              |              |              |
|--------------|--------------|--------------|
| 1.034076831  | 8.275652679  | 13.267949948 |
| 1.466186869  | 10.930204817 | 14.700195739 |
| 3.083498155  | 11.078165402 | 12.979968687 |
| 3.900254340  | 11.574066402 | 15.188522530 |
| 1.989300596  | 8.175408903  | 15.161598233 |
| 3.144125285  | 8.967864029  | 12.184129388 |
| 5.432763991  | 11.870493786 | 13.286427067 |
| 10.979820491 | 8.085797866  | 13.021410833 |
| 0.326044317  | 9.680706393  | 11.456920064 |
| 3.675086447  | 9.326942642  | 16.002574630 |

#### 4. List of Additional references

- 1 C. Hammond, S. Conrad and I. Hermans, *Angew. Chemie - Int. Ed.*, 2012, 51, 11736–11739.
- 2 G. Kresse and J. Furthmüller, *Phys. Rev. B*, 1996, 54, 11169–11186.
- 3 G. Kresse and J. Furthmüller, *Comput. Mater. Sci.*, 1996, 6, 15–50.
- 4 P. E. Blöchl, *Phys. Rev. B*, 1994, 50, 17953–17979.
- 5 J. P. Perdew, K. Burke and M. Ernzerhof, *Phys. Rev. Lett.*, 1996, 77, 3865–3868.
- 6 S. Grimme, J. Antony, S. Ehrlich, and S. Krieg, *J. Chem. Phys.* 2010, 132, 154104.
- 7 W. N. P. van der Graaff, C. H. L. L. Tempelman, G. Li, B. Mezari, N. Kosinov, E. A. Pidko and E. J. M. Hensen, *ChemSusChem*, 2016, 9, 3145–3149.
